[Type here]

[Type here]

Layer et al 1

1 **Live cell kinetic analysis of the LMO2/LDB1 leukemogenic protein complex reveals a**  
2 **hierarchy of turnover with implications for complex assembly**

3

4

5 Justin H. Layer<sup>1</sup>, Michael Christy<sup>1</sup>, Lindsay Placek<sup>2</sup>, Derya Unutmaz<sup>2</sup>, Yan Guo<sup>3</sup>, Utpal P.

6 Davé<sup>\*,1,4</sup>

7

8 \*corresponding author:

9 Dr. Utpal P. Davé  
10 Division of Hematology/Oncology  
11 Department of Medicine and  
12 Department of Microbiology and Immunology  
13 Indiana University School of Medicine  
14 and the Melvin and Bren Simon Cancer Center at IU Health  
15 R.L. Roudebush VA Medical Center  
16  
17 980 W. Walnut St, Walther Hall, R3-C321  
18 Indianapolis, Indiana 46202  
19  
20 Tel: 317-274-3535  
21 Fax: 317-274-0396  
22 [udave@iu.edu](mailto:udave@iu.edu)

23

24

25

26

---

1 Division of Hematology/Oncology Indiana University School of Medicine

2 Jackson Laboratory of Genomic Medicine

3 University of New Mexico Cancer Center

4 Department of Microbiology and Immunology Indiana University School of Medicine

[Type here]

[Type here]

Layer et al 2

27

28 **Summary**

29 Multisubunit protein complexes operate in many cellular functions. The LMO2/LDB1 macromolecular  
30 complex has been posited to be critical in hematopoietic stem and progenitor cell specification and in  
31 the development of acute leukemia. This complex is comprised of core subunits of LMO2 and LDB1 as  
32 well as bHLH and GATA transcription factors. We analyzed the steady state abundance and kinetic  
33 stability of LMO2 and its partners via Halo protein tagging in conjunction with variant proteins deficient  
34 in binding their respective direct protein partners. We discovered a hierarchy of protein stability, with  
35 half lives in descending order: LDB1>SSBP>LMO2>TAL1. Importantly, LDB1's turnover was markedly  
36 prolonged and LDB1 conferred enhanced stability upon each and every subunit component thereby  
37 nucleating the formation of the multisubunit protein complex. Our studies provide significant insights  
38 into LMO2/LDB1 macromolecular protein complex assembly and stability, which has implications for  
39 understanding its role in blood cell formation and for therapeutically targeting this complex in human  
40 leukemias.

[Type here]

[Type here]

Layer et al 3

## 41 **Introduction**

42 In hematopoiesis, lineage-specific transcription factors control specification of the hematopoietic stem  
43 cell (HSC) towards multiple diverse cell types. At the top of this developmental hierarchy are  
44 approximately 9 factors that directly affect the HSC itself: BMI1, RUNX1, GATA2, LMO2, TAL1, LDB1,  
45 MLL, GFI1, and ETV6 (Orkin and Zon, 2008). These master regulators are conserved among all  
46 vertebrates and have been experimentally characterized in mice, zebrafish, and humans (Jagannathan-  
47 Bogdan and Zon, 2013). The knockouts of any one of the genes encoding these factors causes the loss  
48 of all hematopoiesis, both embryonic and adult, by perturbing the creation, survival, or self-renewal of  
49 primitive and definitive HSCs. In examining this gene list, there are three emerging themes: First, the  
50 factors are part of a transcriptional network with autoregulation and inter-regulation (Wilson et al.,  
51 2010); second, the factors are frequently co-opted in human leukemias by various genetic mechanisms  
52 like chromosomal translocation (Greer, 2019); and, third, most remarkably for our study, all the factors  
53 function as part of multi-subunit protein complexes. Four of the factors listed above act in concert within  
54 a remarkable macromolecular complex, the LMO2/LDB1/TAL1/GATA2 (or the LDB1/LMO2) protein  
55 complex. There are diverse data supporting the idea that these proteins are bound together including  
56 co-immunoprecipitation (co-IP), co-purification followed by mass spectrometry, electrophoretic mobility  
57 shift assays, and co-occupancy at target genes by chromatin immunoprecipitation (Layer et al., 2016; Li  
58 et al., 2011; Meier et al., 2006; Wadman et al., 1997; Xu et al., 2003).

59

60 The assembly of the LDB1/LMO2 complex depends upon specific interactions between LMO2 and  
61 class II bHLH proteins, LMO2 and GATA factors, and LMO2 and LDB1. There are multiple bHLH and  
62 GATA paralogs capable of binding LMO2 so multiple versions of the LMO2-associated complex exist  
63 depending upon the expression of the subunits. LMO2 is an 18 kDa protein with two Zinc-binding LIM  
64 domains, LIM1 and LIM2. LIM1 folds to create an interface for binding class II bHLH proteins such as  
65 TAL1 and LYL1 (El Omari et al., 2011). LIM2 has an interface that binds GATA factors 1-3. A portion of

[Type here]

[Type here]

Layer et al 4

66 LIM1 also serves as an interface for binding to the LIM interaction domain (LID) of LDB1. LDB1 has a  
67 self-association domain through which LDB1 may dimerize or multimerize (Liu and Dean, 2019). The  
68 class II bHLH proteins heterodimerize with class I bHLH proteins such as E2.2, E12, E47, and HEB  
69 (Murre, 2019). The bHLH proteins and GATA proteins can be part of the same complex allowing the  
70 LDB1/LMO2 complex to bind adjacent E boxes and GATA sites (Hewitt et al., 2016; Hewitt et al., 2015;  
71 Wadman et al., 1997; Xu et al., 2003). Such motifs bound by LMO2/LDB1 complexes have been  
72 described in erythroid progenitor cells at various gene targets including the beta globin gene promoters  
73 and the locus control region (LCR) (Hewitt et al., 2016; Li et al., 2011; Soler et al., 2010). The self-  
74 association domain of LDB1 mediates looping and proximity between the beta globin LCR and beta  
75 globin proximal promoters, a seminal example of enhancer-promoter communication (Deng et al., 2012;  
76 Krivega et al., 2014b; Liu and Dean, 2019; Song et al., 2007).

77

78 Several iterations of the LDB1/LMO2 complexes are drivers in leukemia. In fact, LMO2 and TAL1 were  
79 originally cloned from chromosomal translocations in T-cell acute lymphoblastic leukemia (T-ALL)(Nam  
80 and Rabbitts, 2006). LMO2 was also the target of insertional activation in gammaretroviral gene  
81 therapy-induced T-ALL (Davé et al., 2004; McCormack and Rabbitts, 2004). Mouse modeling and the  
82 characterization of the LMO2-associated complexes have been highly informative in dissecting the  
83 pathogenesis of LMO2-induced T-ALL, underscoring the role for specific bHLH and GATA factors as  
84 requisite co-operating drivers (Davé et al., 2009; McCormack et al., 2013; Ono et al., 1998; Smith et al.,  
85 2014). We recently confirmed by purification of FLAG-LDB1 and mass spectrometry that the  
86 LMO2/LDB1 complex in T-ALL closely resembles the complex hypothesized to function in normal HSCs  
87 (Layer et al., 2016).

88

89 Regardless of the variation in bHLH or GATA factors or the cofactors that these transcription factors  
90 may recruit, the core subunits of LMO2 and LDB1 are constant. We probed the LMO2/LDB1 interaction

[Type here]

[Type here]

Layer et al 5

91 and discovered a discrete motif within the LDB1 LID that was essential for LMO2 binding. We  
92 consistently observed an increase in steady state abundance of LMO2 with co-expression of LDB1 and  
93 a decrease in abundance with the co-expression of LDB1 $\Delta$ LID (Layer et al., 2016). Remarkably, this  
94 effect was observed in multiple leukemic cells including models for AML, which is consistent with recent  
95 studies showing the essentiality of LMO2 and LDB1 in these leukemias (Wang et al., 2017). To more  
96 closely analyze the effects on protein stability, we sought to understand the kinetics of turnover of  
97 LMO2 and its partner proteins. Towards this end, we devised a pulse chase technique through the use  
98 of multiplexed lentiviral expression of Halo-tagged proteins (Los et al., 2008). We discovered that there  
99 is a hierarchy of protein turnover for the subunits of the complex with LDB1 being the most stable  
100 protein. Furthermore, we discovered that every subunit, including both direct and indirect binding  
101 partners of LDB1, were stabilized by LDB1. These findings have remarkable implications for the  
102 assembly of this important macromolecular complex and underscore LDB1 as the major core subunit  
103 that could be targeted in leukemias.

[Type here]

[Type here]

Layer et al 6

104 **Results**

105 **LMO2 turnover is mediated by ubiquitin-proteasomal system and is inhibited by LDB1**

106 We first approached kinetic analysis of LMO2 turnover by quantitative western blotting after  
107 cycloheximide treatment. We observed half lives in the range of 8-10 hours for endogenous LMO2 in  
108 K562, MOLT4, and LOUCY leukemia cells; the half-life of exogenous LMO2 in Jurkat cells was  
109 measured at approximately 7 hours (data not shown). However, LDB1 decay was not observed by  
110 immunoblot within this same time frame. We were at the detection limits of our cycloheximide chase  
111 assay where cycloheximide toxicity is a confounding issue. Accordingly, we developed an alternative  
112 approach to analyze LMO2 and its associated proteins in live cells without metabolic perturbation and  
113 without toxins. We produced recombinant LMO2 tagged at its amino terminus with the Halo enzyme  
114 (Los et al., 2008). Our prior results showed that carboxyl terminal tags on LMO2 impeded its  
115 degradation so we focused on amino terminal tagging (Layer et al., 2016). We expressed Halo-LMO2 in  
116 Jurkat cells, which do not express endogenous LMO2, where the recombinant protein had enhanced  
117 steady state abundance with LDB1 co-expression (see lanes 6-7, Figure 1C), implying direct binding  
118 with LDB1. This was confirmed by co-immunoprecipitation (co-IP) of Halo-LMO2 with FLAG-LDB1 (data  
119 not shown). Confocal microscopy showed that Halo-LMO2 was localized predominantly in the nucleus  
120 (see Figures 1E-F). Thus, based on all of our conventional assays, Halo-LMO2 behaved just like  
121 untagged LMO2.

122

123 In order to force expression of multiple components of the LDB1/LMO2 complex in various cell lines  
124 individually and in combination, we developed multiplexed lentiviral expression vectors allowing  
125 fluorescence-based sorting and drug selection (Methods and Figure 1A and S1). Then, we  
126 implemented pulse chase analysis of Halo-tagged polypeptides by standard flow cytometry. We pulsed  
127 cells with the membrane-permeable fluorochrome, R110, and analyzed cellular fluorescence and R110

[Type here]

[Type here]

Layer et al 7

128 decay (i.e. chase) through the FITC channel throughout our experiments (Figure 1A-D). We called this  
129 technique for analyzing protein turnover, the **HaloLife** assay. As shown in Figure 1G, after a 90 min  
130 pulse of R110, we plotted the decay of fluorescence for untagged Halo protein and for Halo-LMO2 in  
131 the presence or absence of bortezomib, a specific 26S proteasomal inhibitor used in proteomic analysis  
132 of ubiquitinated moieties and also currently used to treat T-ALL (Kim et al., 2011; Raetz and Teachey,  
133 2016). Bortezomib was tested with or without co-expression of HA-LDB1 or HA-LDB1 $\Delta$ LID, which  
134 cannot bind LMO2. The curves fit a typical first order exponential decay, resulting in half-lives ( $t_{1/2}$ )  
135 calculated and summarized in Figure 1H. Untagged Halo protein showed very slow protein turnover  
136 (Figure 1G), whereas Halo-LMO2 had a  $t_{1/2}$ =6.6 hours, approximately the same  $t_{1/2}$  calculated from  
137 cycloheximide experiments. Co-expression of HA-LDB1 increased Halo-LMO2  $t_{1/2}$  to 20.6 hours  
138 ( $P=1.12E-5$ ). Similarly, bortezomib increased Halo-LMO2  $t_{1/2}$  to 20.2 hours. In contrast, Halo-LMO2 was  
139 degraded faster with co-expression of HA-LDB1 $\Delta$ LID ( $t_{1/2}$ =4.0 hours,  $P= 1.26E-3$ ). In summary, the  
140 presence of LDB1 markedly stabilized LMO2 as measured by the HaloLife assay. Halo-LMO2 turnover  
141 was reduced by bortezomib, implicating the ubiquitin-proteasomal pathway as the mechanism of  
142 degradation. Also, LDB1 $\Delta$ LID, which is deficient in LMO2 binding but capable of homodimerization,  
143 increased the degradation of LMO2, a dominant negative effect which was previously observed in  
144 multiple leukemic cell lines (Layer et al., 2016).

145

#### 146 **Specific LMO2 lysines are required for stabilization and are critical for binding to LDB1**

147 The turnover of LMO2 is particularly intriguing since it is a known driver in T-cell leukemia and an  
148 essential factor in AML (Sun et al., 2013; Wang et al., 2017). Thus, the degradation of LMO2 could be  
149 exploited therapeutically to deplete the protein in diverse leukemias and lymphomas. Our prior  
150 experiments had discovered important features about the LMO2/LDB1 interaction: (1) binding is a  
151 prerequisite for LMO2 stabilization; (2) R<sup>320</sup>LITR within LDB1 are the key interacting residues and single

[Type here]

[Type here]

Layer et al 8

152 residue substitutions within RLITR reduce LMO2 binding to LDB1; (3) I322 was accommodated by a  
153 hydrophobic pocket within LMO2 formed by L64 and L71 (Layer et al., 2016). Based on these data, we  
154 applied the HaloLife assay towards assessing the turnover of various mutant LMO2 proteins. Halo-  
155 LMO2(L64A, L71A) was significantly reduced in steady state abundance, and had faster turnover by  
156 measured  $t_{1/2}=1.5$  h compared to  $t_{1/2}=6.2$  h for Halo-LMO2 (Figure 2A-B). To identify the lysine residues  
157 within LMO2 that are potential sites for ubiquitination, we mutated the 10 lysines in the protein to  
158 arginine. Unexpectedly, lysine-less mutant LMO2 [denoted K(0)] had significantly faster turnover than  
159 LMO2 WT,  $t_{1/2}=4.0$  h versus 6.2 h ( $P=1.06E-3$ ) (Figure 2B). We discovered that LMO2 K(0) was  
160 compromised in binding LDB1 as evidenced by reduced co-immunoprecipitation (Figure S2). We noted  
161 there were two lysines, K74 and K78, in proximity to the LMO2 hydrophobic binding pocket interfacing  
162 with LDB1 R<sup>320</sup>LITR. Halo-LMO2 (K74R, K78R), a mutant protein with only these two key lysines  
163 mutated and the remaining 8 lysines intact, showed significantly faster turnover, measured  $t_{1/2}=3.9$  h  
164 versus to  $t_{1/2}$  of Halo-LMO2 K(0) ( $P=1.76E-3$ ). We also tested the reciprocal mutant, where we left K74  
165 and K78 intact and mutated the remaining 8 lysines to arginine. As shown in Figure 2B, this mutant  
166 LMO2, Halo-LMO2 K(0)(K74, K78) had a measured  $t_{1/2}=5.5$  h, statistically insignificant ( $P=0.107$ ) to the  
167 measured  $t_{1/2}$  of Halo-LMO2 WT. We then tested single substitutions at K74 and K78. Halo-LMO2  
168 K(0)(K74) had a measured  $t_{1/2}=4.8$  h that was significantly ( $P7.28E-3$ ) reduced compared to WT Halo-  
169 LMO2 whereas Halo-LMO2 K(0)(K78)'s  $t_{1/2}$  was not significantly different,  $t_{1/2}=5.1$  h ( $P=0.09$ ) (Figure  
170 2B). Intriguingly, K74 is conserved within all nuclear LIM-only proteins whereas K78 is unique to LMO2  
171 (Figure 2D). Both K74 and K78 restored binding of the lysineless LMO2 to LDB1 (data not shown).  
172 Within lysineless proteins, the amino termini can serve as sites for ubiquitination. In order to show that  
173 the N-terminus of this version of LMO2 was critical for ubiquitin modification (Breitschopf et al., 1998;  
174 Trausch-Azar et al., 2004), we inserted a native LMO2 sequence translated from the longest transcript  
175 of the distal *LMO2* promoter, creating a super-stable protein, Halo-N+LMO2 K(0)(K74, K78) measured



[Type here]

[Type here]

Layer et al 9

176  $t_{1/2}=25$  h ( $P=4.47E-3$ ). In summary, we identified K74 and K78 within LMO2 as essential for LDB1  
177 binding and for normal levels of protein turnover.  
178  
179 Next, we examined the turnover of Halo-LMO2 in Jurkat, KOPT-K1, and K562 leukemia cells, which  
180 have various levels of LDB1 and LMO2. Jurkat cells are derived from T-ALL and express endogenous  
181 LMO1 but no LMO2; KOPT-K1 cells have a chromosomal translocation that results in overexpression of  
182 endogenous LMO2; and, K562 are aneuploid chronic myelogenous leukemia cells, resemble HSPCs,  
183 and express abundant endogenous LMO2 and LDB1 (Figure 3A) (Dong et al., 1995). Halo-LMO2  $t_{1/2}$   
184 was comparable in Jurkat and K562 cells, measured at 6.2 h versus 6.4 h, respectively. The super-  
185 stable Halo-N+LMO2 K(0)(K74, K78) was similarly prolonged,  $t_{1/2}=25$  and  $t_{1/2}=20.9$ , respectively. In  
186 contrast, Halo-LMO2  $t_{1/2}$  measured 1.3 h in KOPT-K1 cells. The fast turnover in KOPT-K1 cells  
187 suggested to us that forced expression of Halo-LMO2 was competing with high endogenous LMO2  
188 (see lanes 5-8, Figure 3A) for the LDB1 LID. K562 cells had approximately equivalent abundance of  
189 LMO2 compared to KOPT-K1 cells, however, Halo-LMO2 turnover in K562 cells was not as fast  
190 perhaps due to the increased expression of endogenous LDB1 in comparison to KOPT-K1 cells (lanes  
191 9-12, Figure 3A). Competition amongst LIM domain proteins is an important determinant of neuronal  
192 cell type specificity in the spinal cord. To test this competition model and its effect upon turnover, we  
193 measured Halo-LMO2  $t_{1/2}$  and the effects of co-expression of competing nuclear LIM domain proteins:  
194 LMO2-HA, LMO1-HA, LMO4-HA, LHX9-HA, and ISL2-HA. These HA-tagged proteins expressed at  
195 various levels in Jurkat cells (lanes 4-8, Figure 4C) but their forced co-expression increased the  
196 turnover of Halo-LMO2 (Figure 3D). These results on  $t_{1/2}$  normalized to the level of expression achieved  
197 (Figure 3C), suggested an approximate order of affinity between LIM domain proteins for LDB1 LID.  
198 LMO2-HA was most competitive followed by LMO1, LMO4, LHX9, and ISL2. The LIM domain proteins  
199 that enhanced Halo-LMO2 turnover showed greater conservation of the key residues that we identified  
200 for LID binding, L64, L71, K74, and K78. All the LIM proteins tested had L64 conserved, however, only

[Type here]

[Type here]

Layer et al 10

201 LMO1 and LMO2 have L71 (Figure 2D). LMO4 and LHX9 have a cysteine residue in place of K78 but  
202 have conserved K74 at the comparable position. Fitting this logic, ISL2, the protein that had no effect  
203 upon Halo-LMO2 turnover suggesting that ISL2 was the weakest competitor for LID binding, has an  
204 arginine residue in place of K74 and a threonine residue in place of K78.

205

206 We also co-expressed other known LMO2 binding partners and measured their effects on LMO2  
207 turnover. TAL1 increased Halo-LMO2  $t_{1/2}$  to 8.9 h ( $P=0.017$ ) but LYL1 did not change it from WT levels  
208 (6.9 v. 7.0 h,  $P=0.75$ ). Co-expression of Myc-GATA2 and Myc-GATA3 both significantly decreased  
209 Halo-LMO2 to 4.9 ( $P=0.013$ ) and 4.8 h ( $P=0.011$ ), respectively. Myc-GATA3 expressed weakly but had  
210 a substantial effect on Halo-LMO2. Finally, Halo-LMO2 had a measured  $t_{1/2}$  of 7.7 h with HA-SSBP2 co-  
211 expression, a statistically insignificant change from WT turnover.

212

### 213 **LDB1 is a long-lived protein in leukemia cells**

214 Based on the stabilization of LMO2, we suspected that LDB1 itself may be long lived and directly  
215 measured its turnover by Halo-tagging. Halo-LDB1 stability was consistent across diverse cell lines,  
216 measuring  $t_{1/2}$  of 23.6-27.6 h in Jurkat, KOPT-K1, and K562 cells (Figure 4A), respectively. Halo-LDB1  
217 turnover was inhibited by bortezomib (Figure 4C). Prior studies had implicated K134 and K365 residues  
218 within LDB1 as affecting its degradation (Howard et al., 2010; Krivega et al., 2014a). Compared to  
219 LDB1 WT, which had  $t_{1/2}$  of 27.7 h, LDB1(K134R) and LDB1(K365R) half-lives were prolonged,  
220  $t_{1/2}=77.2$  h and  $t_{1/2}=48.2$  h, respectively. Immunoblots of LDB1 showed two closely migrating bands, the  
221 slower band being enhanced in abundance with N-ethylmaleimide (NEM) (Figure 4B). This slower  
222 migrating band was not observed in blots for LDB1 (K134R) suggesting the addition of monoubiquitin at  
223 this residue.

224

[Type here]

[Type here]

Layer et al 11

225 In MEL and CHO cells, LDB1 stabilization was dependent upon Single Stranded DNA-Binding Protein 2  
226 (SSBP2) (Xu et al., 2007). In contrast to these studies, LDB1 abundance did not increase with forced  
227 expression of SSBP2 or SSBP3 in any of the leukemic lines analyzed (data not shown). We directly  
228 tested the turnover of SSBP2 and SSBP3 by HaloLife analysis. Each paralog tested, SSBP2, SSBP3,  
229 and SSBP4, had faster turnover than LDB1, measured at  $t_{1/2}$ =5.1 h and  $t_{1/2}$ =6.8 h, and 7.6 h,  
230 respectively. SSBP2 and SSBP3 showed longer half-lives with LDB1 co-expression (Figure 4G).  
231 SSBP2 and SSBP3 stabilization was not seen with co-expression of LDB1 $\Delta$ LCCD, the interaction  
232 domain between SSBP proteins and LDB1 (data not shown). However, the LDB1 $\Delta$ LCCD mutant protein  
233 expressed at lower steady state abundance (see lanes 9-10, Figure 4B and S3), suggesting that there  
234 could be mutual folding and/or stabilization between SSBP proteins and LDB1. In summary, the  
235 HaloLife assay showed that every subunit of the LDB1/LMO2 complex had a shorter half-life than LDB1  
236 and were subject to stabilization by LDB1.

237

### 238 **TAL1 and LYL1 are stabilized by the LMO2/LDB1 complex**

239 TAL1 and LYL1 are necessary cooperating drivers in LMO2-induced leukemia (Ferrando et al., 2002;  
240 McCormack et al., 2013; Smith et al., 2014). These class II bHLH proteins are known binding partners  
241 of LMO2. The binding interface between TAL1 and LMO2 requires F238 within the second helix of the  
242 bHLH domain (Schlaeger et al., 2004), which is conserved as F201 within helix-2 of LYL1 (Figure 5A).  
243 We tested the turnover of Halo-TAL1 and Halo-LYL1 and specific mutants containing F238 and F201,  
244 respectively, by the HaloLife assay. Halo-TAL1 had a  $t_{1/2}$  of 4.2 h and Halo-LYL1 had a  $t_{1/2}$  of 1.8 h  
245 (Figure 5C, E). LMO2-HA co-expression did not significantly ( $t_{1/2}$ =5.6 h with LMO2 v.  $t_{1/2}$ =4.2 h without  
246 LMO2,  $P=0.215$ ) stabilize TAL1 but stabilized LYL1 ( $t_{1/2}$ =4.3 h v. 1.8 h,  $P=0.015$ ). HA-LDB1 co-  
247 expression markedly stabilized Halo-TAL1 and Halo-LYL1 to  $t_{1/2}$  =19.9 h and  $t_{1/2}$  =20.5 h, respectively.  
248 This effect was only observed in the presence of LMO2. Similarly, Halo-TAL1 and Halo-LYL1 half-lives

[Type here]

[Type here]

Layer et al 12

249 were similar to WT levels with co-expression of HA-LDB1 $\Delta$ LID (Figure 5C, E). Thus, LDB1's  
250 stabilization effect was not observed without LMO2 binding. To test the requirement for bHLH to LMO2  
251 binding, we created mutant Halo proteins, Halo-TAL1(F238D), Halo-TAL1(F238G), Halo-LYL1(F201D),  
252 and LYL1(F201G), all of which were compromised in LMO2 binding in co-immunoprecipitation assays  
253 (data not shown). As expected, LMO2 did not stabilize these proteins. Each mutant bHLH protein had a  
254 measured  $t_{1/2}$  comparable to its WT counterpart. HA-LDB1 co-expression increased the  $t_{1/2}$  of Halo-  
255 TAL1(F238D) to 10.7 h (P=0.014). Similarly, Halo-LYL1(F201D) was stabilized by HA-LDB1 co-  
256 expression to  $t_{1/2}$  of 3.7 h (P=0.012). Thus, aspartic acid substitutions for F238 in TAL1 and F201 in  
257 LYL1 completely abrogated LMO2-induced stabilization but partially abrogated LDB1 induced  
258 stabilization. The F238D and F201D mutants may still retain some LMO2 binding especially since  
259 LDB1 stabilizes LMO2 and increases its steady state abundance. In contrast, glycine substitutions at  
260 the same residues completely abrogated both LMO2's and LDB1's effects. In summary, Halo-TAL1 and  
261 Halo-LYL1 half-lives in Jurkat cells, which are partially stabilized by LMO2 co-expression. Their half-  
262 lives are markedly prolonged by LDB1 co-expression but only if the proteins have intact LMO2 binding.  
263

## 264 **Complex assembly and function**

265 Our results implied that intact binding interactions between all of the components created a stable  
266 macromolecular complex. We analyzed whether this assembly occurred in cells and whether complex  
267 assembly has a functional effect on transcription. Each component of our complex was expressed  
268 using a lentiviral vector with unique fluorescence and drug selection (Figures 1A and S1), We included  
269 empty vector controls (Figure 6A) as indicated. We transduced components pairwise with or without  
270 FLAG-LDB1 (F-LDB1) to test abundance (Figure 6A) and binding (Figure 6B) by co-  
271 immunoprecipitation with anti-FLAG monoclonal antibody. The measured half-lives uniformly explained  
272 increased steady state abundances of Halo-tagged proteins detected by Western blot analysis. The  
273 experiments in Figure 6A extend this correlation to untagged or minimally tagged (i.e. single HA)

[Type here]

[Type here]

Layer et al 13

274 proteins as well. SSBP2 was poorly expressed in Jurkat cells so SSBP3 was transduced instead; our  
275 prior experiments had shown comparable peptide counts for SSBP3 and SSBP2 by tandem mass  
276 spectrometry of purified LDB1 complexes (Layer et al., 2016). HA-SSBP3 was stabilized by LDB1 but  
277 not by co-expression of LMO2 (see lanes 6-9, Figure 6A). Consistent with the HaloLife results, TAL1  
278 and LYL1 were maximally stabilized by the co-expression of both LMO2 and LDB1 (see lanes 10, 11 to  
279 12, 13 for TAL1 and lanes 18, 19 to 20, 21 for LYL1).

280

281 Complex assembly was analyzed by anti-FLAG immunoprecipitation via F-LDB1. Jurkat cells have  
282 abundant endogenous TAL1, which was immunoprecipitated by F-LDB1 only in the presence of LMO2  
283 (lanes 2-5, Figure 6B). Endogenous TAL1 co-IP was augmented by co-expression of SSBP3 (lanes 6-  
284 9, Figure 6B). Forced expression of LYL1 did not effectively outcompete endogenous TAL1 for  
285 LMO2/LDB1 binding whereas SSBP3 and LYL1 co-expression reduced steady state TAL1 and TAL1  
286 co-IP (see lanes 21 and 25, Figure 6B). Next, we analyzed the effects of complex formation upon gene  
287 expression. We performed a pairwise comparison of RNA-seq on Jurkat cells transduced with all  
288 complex components (i.e. LMO2, LDB1, SSBP3, and TAL1 or LYL1; lanes 17 and 25 in Figure 6)  
289 versus cells transduced with empty virus (lane 2, Figure 6), generating a ranked list of differentially  
290 expressed genes. Most of the genes on this list were maximally activated or repressed by co-  
291 expression of the full complex and not by expression of partial complex components, as shown for  
292 activation of ALDH1A2, CEBPE (Figure 6E), and NKX31, and other bona fide targets (Figure 6D).

293

#### 294 **HaloLife assay can be used to screen for modifiers of degradation**

295 Next, we asked whether the stable leukemia lines expressing various Halo-tagged proteins can be used  
296 in a screen to identify modifiers of stability. Deubiquitinases (DUBs) of the LMO2-associated proteins  
297 would stabilize LMO2 complex formation and could be important therapeutic targets in leukemias  
298 dependent upon LMO2. Also, the number of genes encoding DUBs was suitable for a targeted screen,

[Type here]

[Type here]

Layer et al 14

299 ~80 genes versus ~400 genes encoding E3 enzymes (Komander and Rape, 2012). We assembled a  
300 lentiviral shRNA library against 70 DUB genes, of which 44 (63%) were expressed in Jurkat cells. We  
301 transduced pooled shRNAs directed against each DUB into individual Jurkat lines stably expressing  
302 Halo-LMO2, Halo-LDB1, Halo-SSBP2, Halo-SSBP3, Halo-TAL1, or Halo-LYL1. After transduction, we  
303 analyzed the cells for their growth and for effects on the Halo-tagged proteins. We devised three criteria  
304 to identify an important hit: (1) if the percentage of R110 fluorescence was reduced at  $t_0$  in cells  
305 transduced with a DUB-specific shRNA compared to scrambled shRNA; (2) a reduction in absolute  
306 Halo signal (i.e. MFI) at  $t_0$ ; or, (3) a reduction in Halo signal after a 5 h chase (Figure 7A). Figures 7B  
307 and S show the outcomes of this screen. We identified a set of shRNAs against a DUB, ALG13, that  
308 met all 3 criteria for every subunit of the complex: Halo-LMO2, Halo-LDB1, Halo-SSBP2, and Halo-  
309 SSBP3 and 2 criteria for Halo-TAL1 and Halo-LYL1 (Figure 7B). Other DUBs that potentially affected  
310 some of the subunits met 2 out of 3 criteria including OTUD7B, USP3, and USP4 (Figure S4). ALG13 is  
311 a DUB with an unusual structure. ALG13 has an amino-terminal glycosyltransferase domain (Gao et al.,  
312 2005) followed by the DUB domain found in the Ovarian Tumor (OTU) class of DUBs and a tudor  
313 domain followed by a proline rich domain (Mevisen et al., 2013). The OTU family of DUBs had several  
314 hits meeting our criteria for various subunits (Figure 7B). The pool of shRNAs against ALG13, was  
315 validated in a secondary screen and a time course for Halo-LMO2 degradation (Figure 7C). As shown  
316 in Figure 7C, the ALG13 shRNA knockdown accelerated the degradation of Halo-LMO2 compared to  
317 transduction of scrambled shRNA control or shRNAs directed against an OTU DUB that is not  
318 expressed in Jurkat cells (OTUB1). The ALG13 shRNA pool was comprised of 5 shRNAs, which we  
319 tested individually in the same assay. Four out of the 5 shRNAs caused increased turnover of Halo-  
320 LMO2 (data not shown). To further validate the role of ALG13 in LMO2 degradation, we performed the  
321 HaloLife assay by forcing the expression of full length ALG13 (1137 aa) or catalytically inactive mutant  
322 ALG13 and measuring the resultant  $t_{1/2}$ . We deleted the DUB domain creating ALG13 $\Delta$ DUB (deleted  
323 catalytic DUB domain) but could not rule out drastic effects upon folding of the protein so we

[Type here]

[Type here]

Layer et al 15

324 engineered a point mutant, ALG13 C242R. Interestingly, alanine substitution at the catalytic cysteine  
325 residue can enhance the affinity for ubiquitin in OTU DUBs so an arginine substitution is the better  
326 residue to evaluate a catalytically inactive DUB (Morrow et al., 2018). We measured  $t_{1/2}$  of Halo-LMO2  
327 of 6.4 h in empty vector control but with forced expression of full length ALG13, we measured  $t_{1/2}=7.6$  h  
328 ( $P=0.009$  for comparison to empty vector control). In contrast, we measured  $t_{1/2}= 6.7$  h ( $P=NS$ ) and 6.3  
329 h ( $P=NS$ ) with ALG13 $\Delta$ DUB and ALG13 C242R mutant proteins, respectively.

[Type here]

[Type here]

Layer et al 16

330 **Discussion**

331 In this study, we describe a novel technique to analyze the turnover of the components of the  
332 leukemogenic LMO2/LDB1 protein complex, employing Halo-tagging and fluorescence-based pulse  
333 chase analysis. The assay, which we termed HaloLife, is informative in that the turnover of tagged  
334 proteins is observed in live cells. Thus, proteins are observed in their natural milieu without  
335 pharmacologic, nutritional, or mechanical disruption. This method has the added advantage of allowing  
336 the testing of the effects of various culture conditions and small molecule therapeutics upon protein  
337 turnover. The Halo tag is advantageous because it is relatively small and monomeric, approximately the  
338 mass of GFP, which has been used in similar studies. Of course, as is the case in all epitope tagging,  
339 one must verify that the tag itself does not disrupt the behavior of the protein. In the case of the proteins  
340 presented here, each one was localized to the nucleus (Figure S5) and retained its affinity for its  
341 physiologic partners. Also, mutations that disrupted binding had the same effect upon Halo-tagged  
342 versions as the untagged proteins themselves. The pulse chase analysis showed that the Halo protein  
343 itself was very long lived ( $t_{1/2} > 100$  h). Each Halo-tagged protein had rapid turnover compared to Halo  
344 itself, such that the fusion proteins acted as “degrons” for the Halo protein. In light of the caveats noted,  
345 the  $t_{1/2}$  measured in the HaloLife assay can be viewed as an approximation of the true half-life of the  
346 native protein. However, all the measured half-lives in this study closely matched those estimated from  
347 cycloheximide chase and quantitative immunoblotting (Lurie et al., 2008) and provided an explanation  
348 for detected changes in steady state abundance. In summary, the HaloLife has the compelling  
349 advantages of being performed in live cells, in their native cellular milieu, and at steady state without  
350 cellular disruption.

351

352 HaloLife analysis of LMO2 and its binding partners revealed a hierarchy of protein turnover with LDB1  
353 being the most stable protein. Observed half-lives in Jurkat cells in increasing order were: Halo-LYL1  
354 (~1.8 h), Halo-TAL1 (~4.1 h), Halo-LMO2 (~6.4 h), Halo-SSBP2 (~5.1 h), Halo-SSBP3 (~6.8 h), and



[Type here]

[Type here]

Layer et al 17

355 Halo-LDB1 (~20-24 h). Most remarkably, co-expression of LDB1 shifted the turnover of these Halo  
356 tagged subunits so that each protein partner assumed a half-life of ~20 h in the presence of excess  
357 LDB1, approximating the measured half-life of LDB1 itself. There was no reciprocal effect since none of  
358 the partner proteins prolonged the half-life of LDB1. All proteins tested were markedly stabilized by  
359 bortezomib, suggesting degradation by the ubiquitin proteasomal system. Each protein partner had to  
360 bind to LDB1 either directly or indirectly, in the case of TAL1 and LYL1, to be stabilized. Taken  
361 together, these findings suggest that the free subunits, those unbound to LDB1, are degraded more  
362 rapidly than those bound to LDB1. Furthermore, the prolonged half-life of LDB1 suggests that it is the  
363 core subunit in the assembly of the bHLH/LMO2/SSBP/LDB1 macromolecular complex, which we term  
364 the LDB1/LMO2 holocomplex. As LDB1 binds to its direct partners, SSBP proteins or LMO2, LDB1  
365 impedes the turnover of other components of the complex so that stepwise assembly and slow turnover  
366 increase the steady state abundance of the holocomplex. Accordingly, each subunit assumes a half-life  
367 similar to that of LDB1, suggesting that the whole complex may be degraded *en masse*. Two distinct  
368 lysines within LDB1, K134 and K365, have been implicated in LDB1 turnover. Both K134R and K365R  
369 mutations markedly prolonged LDB1 turnover by the HaloLife assay compared to wild type LDB1,  
370 thereby confirming the role of these lysine residues in LDB1 stability. Neither lysine is within a domain  
371 mediating subunit binding (i.e. LDB1's LCCD, residues 200-249, is responsible for SSBP binding and  
372 the LID is comprised of residues 300-330), Thus, these residues are unlikely to be occluded from  
373 ubiquitination by SSBP or LMO proteins. On the other hand, K134 is within the dimerization domain, so  
374 K134 could be masked by homodimerization. This raises the possibility of LDB1 homodimers being  
375 more stable than monomers. We discovered a slower migrating LDB1 in the presence of N-  
376 ethylmaleimide that is consistent with a monoubiquitin conjugation to K134. If we assume this residue is  
377 only accessible in unbound LDB1, then we predict that this monoubiquitinated LDB1 is monomeric.  
378 Although the stoichiometry of the LDB1 holocomplex has not been definitively solved, our prior mass  
379 spectrometry data do suggest stable LDB1 dimers in nuclear lysates. Interestingly, this theme of

[Type here]

[Type here]

Layer et al 18

380 accessible lysines may be extended to the turnover of LMO2 and SSBP proteins as well. Our  
381 experiments with LMO2 implicated K74 and K78 in LDB1 binding. These residues may be sites of  
382 ubiquitination and may be exposed in free LMO2 subunits but sterically hindered in LMO2 bound to  
383 LDB1. Alternatively, K74 and K78 may be subject to other post-translational modifications such as  
384 methylation or acetylation. K78 is particularly intriguing since it is unique to LMO2 and is adjacent to a  
385 hydrophobic pocket (L64 and L71) such that neutralization of the side chain amine would favor LDB1  
386 binding by accommodating I322. This contact interface is supported by a crystal structure of an LMO2-  
387 LID fusion protein (El Omari et al., 2011). We co-purified SSBP3 with FLAG-LDB1 and detected a diGly  
388 motif on K35 in the mass spectrometry data (data not shown), which could be a remnant of trypsinized  
389 ubiquitin, although NEDD8 and ISG13 are other possible conjugates (Emanuele et al., 2011).  
390 Nevertheless, K35, K7, and other conserved lysines are within the LUF5 domain of SSBP proteins and  
391 are expected to be masked by LDB1 binding whereas free SSBP subunits should have more  
392 accessible lysine residues for modification. In summary, free subunits of the LMO2/LDB1 complex are  
393 rapidly degraded in comparison to the slow degradation kinetics of the holocomplex. Complex  
394 assembly may proceed through binding and stabilization by masking key lysine residues in the free  
395 subunits. Recombinant full-length proteins and a structure of the holocomplex may be able to test this  
396 model. On a more general note, our studies suggest that multisubunit protein complexes may have key  
397 core subunits with enhanced stability that can be conferred upon binding subunits. To name a few  
398 examples, core subunits analogous to LDB1 exist for the T-cell receptor, BAF complex, Mediator  
399 complex, and TFIID protein complexes (Bonifacino et al., 1990; Cai et al., 2010; Imasaki et al., 2011;  
400 Mashtalir et al., 2018; Wright et al., 2006). It would be interesting to see whether lysine residues  
401 targeted for ubiquitination are masked in other macromolecular assemblies as well.  
402  
403 Prolonged turnover of nuclear factors and transcription factors has been suggested to be due to their  
404 association with chromatin. The subunits of the LDB1/LMO2 complex were localized to the nucleus, at

[Type here]

[Type here]

Layer et al 19

405 least 2-fold over cytoplasm but we could not analyze whether they were chromatin-bound. The slow  
406 turnover of the LMO2/LDB1 holocomplex obviates the need to form new chromosomal loops that co-  
407 localize enhancers to core promoters during every cycle of RNA Pol II recruitment, which would be  
408 energetically unfavorable. Notably, co-expression of all complex components resulted in maximal target  
409 gene activation or repression implying that assembly of the holocomplex is what is needed to effect  
410 gene regulation.

411

412 It is important to note that the HaloLife assays were all performed in leukemic cells. The leukemia lines  
413 were of diverse lineages. Even so, one cannot rule out a general defect in the turnover of LMO2 and  
414 LDB1 in all of these lines. The work shown here required the development of novel lentiviral vectors to  
415 allow co-expression of all complex partners in the same cell. Similar analysis in normal hematopoietic  
416 cells would be challenging but is being explored since the turnover and stoichiometry of this complex in  
417 primary hematopoietic cells is of great interest and a part of our ongoing research. Lentiviral  
418 transduction of hematopoietic stem cells is inefficient and co-expression by multiple transductions  
419 would be very challenging. Of course, studying the turnover of LMO2 and LDB1 in leukemic lines is  
420 suitable for studying leukemia pathogenesis. Importantly, careful analysis of this protein complex  
421 turnover has major implications for regulating these major drivers of leukemia. Recent data from mouse  
422 genetics strongly supports a role for *Ldb1* in *Lmo2*-induced leukemia. The *CD2-Lmo2* transgenic  
423 mouse model develops T-ALL with long latency but with complete penetrance (Smith et al., 2014).  
424 Conditional deletion of *Ldb1* in this model abrogated T-ALL onset (UPD personal observation). Thus,  
425 *Ldb1* is a required *Lmo2* partner in this murine model of T-ALL. This compelling result from mouse  
426 genetics coupled with the primacy of LDB1 in a protein turnover hierarchy underscore the potential for  
427 targeting the LMO2/LDB1 interface in leukemias. If LMO2 is dissociated from LDB1 then free LMO2  
428 and TAL1 are expected to undergo rapid degradation. Supporting this idea, the co-expression of LIM  
429 domain proteins that competed for the LID (LMO1, LMO2, LMO4, and LHX9) accelerated Halo-LMO2

[Type here]

[Type here]

Layer et al 20

430 turnover. ISL2, which has the least similarity to LMO2 residues responsible for LID binding, did not  
431 accelerate turnover, underscoring the determinants of LID binding as a mechanism for LIM protein  
432 competition. We predict a small molecule that could bind to the LID interface would also accelerate  
433 LMO2 turnover. Of course, such an inhibitor of LMO2 binding to LDB1 would affect normal  
434 hematopoietic stem cells as well. However, there could be a therapeutic index with higher LMO2/LDB1  
435 holocomplex-expressing cells predicted to be more sensitive to such inhibition.

436

437 Previous work implicated RNF12 as a potential E3 enzyme responsible for LDB1 and LMO2  
438 degradation (Güngör et al., 2007; Ostendorff et al., 2002; Xu et al., 2007). However, in our experiments,  
439 steady state abundance of LDB1 and other subunit proteins were unchanged with forced expression of  
440 RNF12 in Jurkat cells (data not shown). Thus, additional investigation is needed to characterize the  
441 degradation machinery of the LMO2 holocomplex especially in its normal or leukemic cellular contexts,  
442 which could reveal E3 enzymes or DUBs that could be therapeutically targeted. DUB enzymes are  
443 particularly amenable to small molecule inhibition since proteolytic mechanisms have been extensively  
444 studied. An shRNA knockdown screen using the HaloLife assay showed a very compelling candidate  
445 DUB, ALG13. There were other candidates identified in our screen such as OTUD7B, but ALG13  
446 fulfilled our screening criteria and affected all subunits with no effect upon Halo protein itself. Recently,  
447 with the development of Proteolysis Targeting Chimeras (i.e. PROTACs), there is great interest in small  
448 molecules that can induce targeted degradation by recruitment of E3s to proteins of interest (Deshaies,  
449 2015). Actually, one of these PROTACs is being analyzed in phase II clinical trials with similar  
450 molecules on the horizon (Lai and Crews, 2017). In contrast, bortezomib is being tested in a  
451 randomized clinical trial in T-ALL as an addition to state of the art multiagent chemotherapy. The results  
452 from our study show that bortezomib stabilizes LMO2 oncoprotein, which can potentially antagonize the  
453 effect of chemotherapies. However, the overall effect of bortezomib upon T-ALL and patient survival  
454 are difficult to predict since bortezomib affects pathways other than LMO2 causing proteotoxic stress in

[Type here]

[Type here]

Layer et al 21

455 leukemic cells (Vilimas et al., 2007). Our ongoing work on LMO2/LDB1 complex turnover should be  
456 highly revealing for both normal hematopoietic stem cell biology and for the development of novel  
457 leukemia therapies.

[Type here]

[Type here]

Layer et al 22

458 **Acknowledgements**

459 We thank Drs. Yuichiro Takagi, Sabine Wenzel, Mark Goebel, Merv Yoder, Reuben Kapur, and Jörg  
460 Bungert for helpful discussions. This work was supported in part by Merit Review Award #  
461 I01BX001799 from the United States Department of Veterans Affairs, Biomedical Laboratory Research  
462 and Development Service, and R01CA207530 from the National Cancer Institute, awarded to UPD.  
463 Additional support was provided to UPD by the Strategic Research Initiative of the Indiana University  
464 School of Medicine. JHL was a recipient of the Biomedical Research Grant from Indiana University. We  
465 acknowledge the IUSCC Flow Cytometry Core and the Genomics Core. JHL and UPD both thank Drs.  
466 Steve Brandt, Mark Koury and Ray Mernaugh, for all of their guidance and help through the years. JHL  
467 acknowledges and thanks Dr. P.A. Weil, for consistently imparting the value and power of thoughtful  
468 experimental controls, amongst every one of his many trainees.

469

470 **Competing Interests**

471 UPD and JHL have a filed patent for the lentiviral vector system described. There are no other  
472 competing interests.

473

[Type here]

[Type here]

Layer et al 23

474 **Figure Legends**

475 **Figure 1. Pulse chase analysis of Halo-LMO2 in live cells demonstrates that LMO2 turnover is**  
476 **constrained by LDB1 and proteasomal inhibition.**

477 (A) Schematic showing the structure of the lentiviral expression vector; the recombinant expression  
478 cassette features a fluorescent protein and drug resistance proteins separated by a P2A  
479 protease site (see Materials and Methods).

480 (B) Schematic showing the HaloLife assay. Cell transduction followed by pulse chase with cell-  
481 permeable Halo ligand.

482 (C) SDS-PAGE immunoblot analysis of transduced cells. Expression (EBFP11) and loading controls  
483 (VCP) included.

484 (D) Confocal microscopy images

485 (E) Imagestream flow microscopy images

486 (F) Flow histograms showing gating strategy for analysis of transduced cells. Bottom 3 histograms  
487 show EBFP fluorescence versus Halo fluorescence. Middle panels show untagged Halo protein;  
488 bottom panel shows Halo-LMO2 at t=0 (left) and t=5 h (right).

489 (G) Plots of fluorescence decay during chase period. Curves were modeled to generate  $t_{1/2}$ .

490 (H) Bar graph showing the  $t_{1/2}$  of Halo-LMO2 with co-expression of LDB1, LDB1 $\Delta$ LID, and  
491 bortezomib.

492 (I) Model showing LMO2 stabilization by LDB1 when bound and degradation when unbound.

493

494

495

[Type here]

[Type here]

Layer et al 24

496 **Figure 2. Critical Lysines K74 and K78 are required for LMO2/LDB1 binding and for LMO2**  
497 **turnover.**

498 (A) Immunoblot analysis of various Halo-LMO2 proteins. Expression (EBFP11) and loading controls  
499 (VCP) included.

500 (B) Half lives of Halo-LMO2 proteins and their variants.

501 (C) PyMOL generated structure of the LMO2-LID fusion polypeptide . LMO2 backbone in orange  
502 and LID backbone in yellow. Key residues are discussed in text.

503 (D) Alignment of LIM domain proteins.

504 (E) Schematic showing a model for LMO2 stabilization by LDB1 and degradation in its free form.

505

506

507



[Type here]

[Type here]

Layer et al 25

508 **Figure 3. LIM domain proteins compete for LDB1 in leukemic cells and can accelerate LMO2**  
509 **turnover.**

510 (A) Immunoblot showing Halo-LMO2 in various cell lines. Blots show endogenous LMO2 and LDB1  
511 with expression and loading controls.

512 (B) T1/2 for Halo-LMO2 and mutant Halo-LMO2 from HaloLife assay in Jurkat, KOPT-K1, and K562  
513 cells.

514 (C) Immunoblot of various HA-tagged LIM domain proteins transduced into Jurkat cells.

515 (D) Bar graph showing half-lives of Halo-LMO2 with co-expression of various LIM domain proteins  
516 and other direct binding partners. P values for pairwise, two-tailed comparisons to empty vector  
517 are shown above the bars.

518

519

520

[Type here]

[Type here]

Layer et al 26

521 **Figure 4. LDB1 is a long-lived protein in leukemia cells.**

522 (A) bar graph showing half lives of Halo-LDB1 in Jurkat, KOPT-K1, and K562 cells.

523 (B) Immunoblot analysis of various Halo-tagged LDB1 proteins. All even lanes are extracts  
524 prepared in the presence of N-ethylmaleimide (NEM).

525 (C) Bar graph showing half lives of Halo-LDB1, in the presence of bortezomib, and Halo-LDB1  
526 K134R or Halo-LDB1 K365R.

527 (D) Model showing ubiquitination on LDB1 K134.

528 (E) Immunoblot analysis of Halo-LMO2, Halo-LDB1, Halo-TAL1, Halo-LYL1, Halo-SSBP2, and  
529 Halo-SSBP3. Expression and loading controls are shown.

530 (F) Half lives of Halo-SSBP2, Halo-SSBP3, and Halo-SSBP4.

531 (G) Half life of Halo-SSBP3 with vector and HA-LDB1 co-expression.

532 (H) Schematic showing a model for SSBP degradation and stabilization by LDB1.

533 (I) Half lives of Halo-GATA1, Halo-GATA2, and Halo-GATA3.

[Type here]

[Type here]

Layer et al 27

534 **Figure 5. TAL1 and LYL1 are stabilized by LMO2/LDB1 binding.**

535 (A) Amino acid alignment of TAL1 and LYL1 bHLH domains. TAL1 F238 has been experimentally  
536 implicated in LMO2 binding corresponding to LYL1 F201.

537 (B) Immunoblot of Halo-TAL1 or mutant TAL1 proteins expressed on their own or in the presence of  
538 LMO2-HA, HA-LDB1, or both.

539 (C) Bar graph showing the half lives of Halo-TAL1 proteins in the absence or presence of LMO2-HA  
540 and HA-LDB1. Schematic above graph shows the expression cassettes with different antibiotic  
541 selection.

542 (D) Immunoblot of Halo-LYL1 or mutant LYL1 proteins expressed on their own or in the presence of  
543 LMO2-HA, HA-LDB1, or both.

544 (E) Bar graph showing the half lives of HALO-LYL1 proteins in the absence or presence of LMO2-  
545 HA and HA-LDB1. Schematic above graph shows the expression cassettes with different  
546 antibiotic selection.

547

548

549

[Type here]

[Type here]

Layer et al 28

550 **Figure 6. Reconstitution of the LMO2/LDB1 complex and its transcriptional output.**

- 551 (A) Schematic showing the lentiviral expression cassettes with fluorescent protein expression and  
552 antibiotic selection.
- 553 (B) Immunoblot analysis of whole cell lysates prepared from Jurkat cells transduced with the  
554 respective proteins. Expression control is shown by anti-GFP or anti-V5 in the case of mScarlet.  
555 Two independent loading controls, anti-tubulin and anti-VCP, are shown.
- 556 (C) Immunoblots of immunoprecipitations of Flag-LDB1 with anti-Flag.
- 557 (D) Heat map showing the top 50 genes and their expression in 3 different transduction groups,  
558 empty vectors, LMO2/LDB1/SSBP3/TAL1, and LMO2/LDB1/SSBP3/LYL1.  
559

[Type here]

[Type here]

Layer et al 29

560 **Figure 7. HaloLife screen of DUB genes.**

561 (A) Schematic shows the experimental assay for shRNA screening for DUBs. Yellow denotes DUB

562 shRNA knockdowns that fulfilled 2 of the 3 stated criteria whereas red denotes those

563 knockdowns that fulfilled all 3 criteria.

564 (B) Table shows hits within the OTU DUB family of genes.

565 (C) Decay curve of Halo-LMO2 after shRNA knockdown of respective DUB RNAs.

566 (D) Immunoblot of FLAG-ALG13 proteins, WT,  $\Delta$ DUB, or C242R in K562 cells.

567 (E) Half lives of Halo-LMO2 with co-expression of vector, or ALG13 WT, ALG13 $\Delta$ DUB, or

568 ALG13(C242R).

569

[Type here]

[Type here]

Layer et al 30

570 **MATERIALS AND METHODS**

571 **CONTACT FOR REAGENT AND RESOURCE SHARING**

572 Further information and requests for resources and reagents should be directed to and will be fulfilled  
 573 by the Lead Contact, Dr. Utpal Davé ([udave@iu.edu](mailto:udave@iu.edu)).

| REAGENT or RESOURCE                                         | SOURCE                    | IDENTIFIER      |
|-------------------------------------------------------------|---------------------------|-----------------|
| Antibodies                                                  |                           |                 |
| mouse monoclonal antiLDB1 IgG                               | Santa Cruz                | Cat# sc-376030x |
| goat antimouse IgG Fc-horseradish peroxidase (HRP)conjugate | Thermo/Pierce             | Cat#31439       |
| mouse antivalosin-containing protein antibody               | Abcam                     | Cat#ab11433     |
| mouse Anti LMO2                                             | Levy, Layer               |                 |
| anti FLAG-HRP conjugate                                     | Sigma                     | Cat#A8592       |
| anti HA-HRP conjugate                                       | Roche                     | Cat#12013819001 |
| anti V5-HRP conjugate                                       | Invitrogen                | Cat#46-0708     |
| rabbit polyclonal anti TAL1 IgG                             | Bethyl                    | Cat#A305-300A   |
| goat anti rabbit IgG conjugate                              | Jackson<br>ImmunoResearch | Cat#211-032-171 |
| mouse monoclonal anti SSBP2 IgG                             | Santa Cruz                | Cat#166687      |
| mouse monoclonal anti HALO IgG                              | Promega                   | Cat#G921A       |
| mouse monoclonal anti GFP IgG                               | Roche                     | Cat#11814460001 |
| Rabbit polyclonal anti tubulin IgG                          | Santa Cruz                | Cat#SC9104      |
| mouse anti valosin-contaning protein (VCP)                  | Abcam                     | Cat#ab11433     |
| Chemicals, Peptides, and Recombinant Proteins               |                           |                 |
| Bortezomib                                                  | MP Biomedicals, LLC       | Cat#180869      |
| HaloTag Ligand R110                                         | Promega                   | Cat#G3221       |

[Type here]

[Type here]

Layer et al 31

|                                                         |                       |                                                                                               |
|---------------------------------------------------------|-----------------------|-----------------------------------------------------------------------------------------------|
| SYTO 17 red fluorescent nucleic acid stain              | Molecular Probes Inc. | Cat#S7579                                                                                     |
| pBluescript SK                                          | Stratagene            |                                                                                               |
| Iscove's modified Dulbecco's medium<br>(IMDM)           | Gibco                 | Cat#12200-036                                                                                 |
| RPMI 1640                                               | Gibco                 | Cat#31800-022                                                                                 |
| Penicillin Streptomycin Solution 10X                    | Corning               | Cat#30-022-CI                                                                                 |
| Geneticin                                               | Gibco                 | Cat#10131-027                                                                                 |
| 0.05% Trypsin, 0.53 mM EDTA 1X [-]sodium<br>bicarbonate | Corning               | Cat#20116004                                                                                  |
| Puromycin dihydrochloride                               | Fisher Bioreagents    | Cat#BP2956-100                                                                                |
| Pierce Protease Inhibitor Tablets                       | ThermoScientific      | Cat#A32965                                                                                    |
| Hygromycin B in PBS 50mg/ml                             | Invitrogen            | Cat#10687010                                                                                  |
| anti-FLAG M2 resin                                      | Sigma                 | Cat#A2220                                                                                     |
| Protein A/G resin                                       | Santa Cruz            |                                                                                               |
| polyvinylidene difluoride (PVDF) membrane               | GE                    | Cat#10600022                                                                                  |
| SuperSignal PicoWest Plus                               | Thermo/Pierce         | Cat#1863099                                                                                   |
| Experimental Models: Cell Lines                         |                       |                                                                                               |
| Human: HEK 293                                          | ATCC                  |                                                                                               |
| Human: Jurkat                                           | ATCC                  |                                                                                               |
| Human: K562                                             | ATCC                  |                                                                                               |
| Human: KOPTK1                                           | ATCC                  |                                                                                               |
| Human: LOUCY                                            | ATCC                  |                                                                                               |
| Human: U937                                             | ATCC                  |                                                                                               |
| Software and Algorithms                                 |                       |                                                                                               |
| Flowjo 10.3 analysis software                           | FLOWJO, LLC           | <a href="https://www.flowjo.com/solutions/flowjo">https://www.flowjo.com/solutions/flowjo</a> |
| Ideas Software                                          | Amnis Corporation     | <a href="http://www.emdmillipore.com/">http://www.emdmillipore.com/</a>                       |

[Type here]

[Type here]

Layer et al 32

|                                       |              |                                                                                     |
|---------------------------------------|--------------|-------------------------------------------------------------------------------------|
| ImageLab 5.2.1                        | BioRad       | <a href="https://www.bio-rad.com">https://www.bio-rad.com</a>                       |
| Imaris                                | Bitplane Inc |                                                                                     |
|                                       |              |                                                                                     |
| Other                                 |              |                                                                                     |
| CytoFLEX benchtop cytometer           | Beckman      | <a href="https://www.beckman.com">https://www.beckman.com</a>                       |
| Leica TCS SP8 confocal imaging system | Leica        | <a href="https://www.leica-microsystems.com">https://www.leica-microsystems.com</a> |
| ImageStream MkII                      | Amnis        | <a href="https://www.luminexcorp.com">https://www.luminexcorp.com</a>               |

574



[Type here]

[Type here]

Layer et al 33

## 575 **Development of a novel multiplexed lentiviral expression vector system**

576 Previously we used multiplexed lentiviral infection with GFP- and RFP-marked viruses to create  
577 recombinant leukemia cell lines, in conjunction with fluorescence assisted cell sorting (FACS) (Layer et  
578 al., 2016). FACS sorting was laborious and expensive, while the use of GFP and RFP markers limited  
579 the number of co-expressed recombinant factors to two (LDB1 and LMO2). Moreover, we observed that  
580 initially homogenous FACS-sorted cell lines could inactivate transgene (GFP or RFP) expression over  
581 time, consistent with either transgene silencing or competitive advantage/outgrowth of low-expressing  
582 clones (JHL and UPD, unpublished). This phenomenon occurred variably amongst different cell  
583 lines/types. To circumvent these limitations for the present study, we designed a suite of novel lentiviral  
584 vectors. This modular vector family expresses additional fluorescence protein markers that are spectrally  
585 distinct, allowing multiplexed co-infection with five or more different viruses. Each vector also encodes a  
586 unique antibiotic resistance marker to allow for positive selection of transduced cells. Antibiotic  
587 resistance of transduced cells foregoes the need for FACS, and disallows transgene silencing within  
588 transduced cell lines; all of which can be proven by antibiotic-enforced consistency of fluorescence  
589 marker expression, as monitored by flow cytometry.

590

## 591 **Lentiviral vector construction**

592 We modified a previously described second generation lentiviral vector (Unutmaz et al., 1999). First, an  
593 artificial DNA fragment containing the encephalomyocarditis virus internal ribosomal entry site (IRES)  
594 sequence, enhanced green fluorescent protein (EGFP) cDNA, and puromycin resistance (PURO) cDNA  
595 were assembled *in silico* using publicly available DNA sequences, as follows. A 5' EcoRI site preceded  
596 the IRES sequence, which was immediately followed by a SfiI site flanking the 5' end of EGFP coding  
597 sequence. The initiator methionine codon of EGFP was embedded in the SfiI site. The codon for the  
598 last amino acid of EGFP was immediately followed by an NheI site, which immediately preceded the 5'  
599 end of an artificial cDNA encoding human-codon optimized Picornavirus 2A (P2A)-PURO resistance  
600 fusion gene. An XhoI site immediately followed the stop codon of the P2A-PURO cassette. This fragment

[Type here]

[Type here]

Layer et al 34

601 was synthesized as a G Block by Integrated DNA Technologies (IDT, Coralville, Iowa). Synthetic DNA  
602 was digested with EcoRI and XhoI and ligated to equivalently digested pBluescript SK (+) (Stratagene).  
603 Multiple clonal isolates were subjected to automated DNA sequencing with 5' M13R and 3' T7 promoter  
604 primers. A single clone perfectly matching the DNA sequence was digested preparatively with EcoRI  
605 and XhoI; liberated insert was isolated and ligated to equivalently digested pH110 (Unutmaz et al., 1999).  
606 The resultant construct is referred to as pH163-EGFP-PURO. Functionality of pH163 EGFP PURO was  
607 first tested for production of virus that could transduce Jurkat cells to EGFP positivity and puromycin  
608 resistance (see details below), and the vector backbone was subsequently used as a basis to create  
609 additional constructs encoding different combinations of fluorescence markers and antibiotic resistances,  
610 as follows. SfiI/NheI fragments corresponding to mCLOVER3, DsREDII, mAPPLE, mSCARLET, EBFPII,  
611 mTagBFPII, EYFP, mCITRINE, CERULEAN, mKATE1.3, SMurfBV+, firefly Luciferase, or *S. pyogenes*  
612 Cas9 were designed in silico such that non-coding substitutions were made to eliminate any internal NotI,  
613 EcoRI, SfiI, NheI, or XhoI sites. Codons were also optimized for human adaptive index on a case-by-  
614 case basis, as necessary. mCLOVER3, mSCARLET, mTagBFPII, mKATE1.3, and SMurfBV+ fragments  
615 also encoded an amino terminal V5 epitope tag, useful for detection of the recombinant protein in cellular  
616 extracts via western blotting. Synthetic G Block DNA was digested with SfiI/NheI and use to replace the  
617 equivalent EGFP fragment from H163 EGFP PURO. Insert DNA was verified by automated DNA  
618 sequencing, and constructs were tested for functionality according to viral production and  
619 transduction/expression within Jurkat cells of the respective fluorescent protein, along with resistance to  
620 puromycin.

621  
622 NheI/XhoI fragments corresponding to P2A-HYGRO, P2A-NEO, P2A-ZEO, and P2A-BLAST were  
623 designed in silico according to the above considerations, and synthetic DNAs were used to replace the  
624 equivalent P2A-PURO cassette in H163-EGFP-PURO. Individual clonal constructs were  
625 validated/tested for ability to produce virus functional for transduction of Jurkat cells to EGFP positivity  
626 and resistance to Hygromycin B, G418, Zeocin, or Blasticidin, respectively.

[Type here]

[Type here]

Layer et al 35

627 Individual clones conferring the appropriate fluorescent protein expression in combination with PURO  
628 selection, or antibiotic resistance companion with EGFP expression, were used to isolate the functionally  
629 validated and relevant SfiI/NheI or NheI/XhoI fragment. The isolated functional DNA fragments were  
630 used to reconstitute the desired combination of fluorescent marker and antibiotic resistance in the H163  
631 vector backbone, as depicted in FIGURE S1/TABLE X.

632

### 633 **cDNAs and tagged constructs**

634 Subcloning of the 375 amino acid (aa) human LDB1 cDNA was described previously (Layer et al., 2016);  
635 wild type cDNA and mutant derivatives were arranged as either 5' NotI/3' EcoRI or 5' BamHI/3' EcoRI  
636 fragments. Vector-embedded epitope tags appended to LDB1 constructs were N-terminal and were  
637 either tandem biotin acceptor domain (BAD)/FLAG  
638 (MAGGLNDIFEAQKIEWHEGGENLYFQGGDYKDDDDKGGAAASKVRS, FLAG peptide underlined) or  
639 HAx1 (MYPYDVPDYAGG). The 158 aa wild type human LMO2 cDNA or mutant derivatives were  
640 synthesized as G Blocks with tandem 5' NotI/BamHI and 3' EcoRI sites and ligated into NotI/EcoRI  
641 digested pBluescript II SK (+). The LMO2 cDNA encoded tandem C-terminal HA (GGMYPYDVPDYA)  
642 and SII (GGWSHPQFEK) tags. cDNAs encoding wild type or mutant human 331 aa TAL1, 280 aa LYL1,  
643 361 aa SSBP2, and 388 aa SSBP3 were all synthesized as G Blocks with 5' NotI/BamHI and 3' EcoRI  
644 sites and ligated into NotI/EcoRI digested pBluescript II SK (+). Sequence encoding N-terminal HAx1  
645 tag (MYPYDVPDYAGG) was located between the 5' NotI and BamHI sites, and the BamHI site  
646 immediately preceded the natural initiator methionine codon. In order to create Lentiviral vectors  
647 encoding subunits with BAD/FLAG, HA/SII, or HAx1 tags, clonally-derived NotI/EcoRI fragments  
648 encoding BAD/FLAG-LDB1, LMO2-HA/SII, HAx1-TAL1, HAx1-LYL1, HAx1-SSBP2, or HAx1-SSBP3  
649 were transferred from pBluescript II SK (+) vectors into likewise digested H163 vectors. The N-terminal  
650 312 aa Halo tag sequence was PCR amplified from His<sub>6</sub>HaloTag® T7 Vector pH6HTN (Promega) as a  
651 5' SpeI, 3' BamHI/EcoRI fragment and ligated into SpeI/EcoRI digested pBluescript II SK (+); the resultant  
652 vector was named pHalo-tag-N. Tandem TGA stop codons were located between the BamHI and EcoRI

[Type here]

[Type here]

Layer et al 36

653 sites. N-terminal HALO fusion constructs were created by ligating clonally-derived BamHI/EcoRI  
654 fragments encoding LDB1, LMO2, TAL1, LYL1, SSBP2, or SSBP3 into equivalently digested pHalo-tag-  
655 N. In order to create lentiviral vectors encoding N-terminal HALO fusions, NotI/EcoRI fragments were  
656 recovered from these pHalo-tag-N vectors and ligated into likewise-digested H163 vectors in order to  
657 create H163-Halo-tag-N subunit vectors. All recombinant DNA manipulation and propagation utilized *E.*  
658 *coli* XL1 Blue. All clonal inserts were verified in their entirety by automated DNA sequencing. All mutant  
659 derivatives used optimal human codons to encode amino acid substitutions. Maxipreps of lentiviral vector  
660 DNA for transfection/virus production were prepared by a modified alkaline lysis/lithium chloride/PEG  
661 precipitation protocol in conjunction with extensive phenol/chloroform extraction and ethanol  
662 precipitation. Additional details regarding constructs or protocols are available upon request.

663

664 **Cell lines, tissue culture, recombinant lentiviruses, transductions, and production of stable cell**  
665 **lines**

666 HEK 293T, Jurkat, K562, U937, KOPT-K1, and LOUCY cells were acquired from the American Type  
667 Culture Collection (ATCC). HEK293T cells were cultured in Iscove's modified Dulbecco's medium  
668 (IMDM)–10% fetal bovine serum (FBS), and other lines were cultured in RPMI 1640–10% FBS, at 37°C  
669 in 5% CO<sub>2</sub>. Log-phase HEK 293T cells in 10-cm dishes containing 10 ml medium and 5 × 10<sup>6</sup> to 8 ×  
670 10<sup>6</sup> cells were transfected by a calcium phosphate–HEPES-buffered saline method with 1 pmol pH163  
671 constructs and 2 pmol pMD-2 for producing pseudotyped lentiviruses. At 12 to 18 h posttransfection,  
672 medium was aspirated and replaced with 6 ml fresh medium, which was harvested and replaced at 24 h  
673 and 48 h. Media containing viral particles was aliquoted and frozen at -80°C and viral titer was  
674 subsequently estimated by serial dilution infection of Jurkat cells. Varying volumes of viral supernatant  
675 were mixed with 5 × 10<sup>6</sup> to 1 × 10<sup>7</sup> log phase Jurkat cells in a final volume of 10 ml within a T-25 flask  
676 (Eppendorf) and subsequently cultured for 72 hours, at which time percentage of fluorescence-positive  
677 cells was first roughly determined using an EVOS FL inverted fluorescence microscope (Invitrogen), and  
678 then precisely determined using a CytoFLEX benchtop cytometer (Beckman). Microscopy and Cytometry

[Type here]

[Type here]

Layer et al 37

679 gating parameters were established using parallel culture of non-infected cells as reference. A multiplicity  
680 of infection (MOI) of 1 was associated with a fluorescence-positivity of 30% or less. Typical viral titers  
681 were  $1-2 \times 10^6$  infectious particles per milliliter. Jurkat cells infected at an MOI of 1-2 were expanded into  
682 a 50 ml culture containing antibiotics to eliminate non-infected cells. Antibiotic regimen and dose varied  
683 depending upon the selectable marker encoded by the virus in question and the cell line being  
684 transduced; antibiotic concentration kill curves were empirically established for naïve cell lines. As an  
685 example, typical antibiotic concentrations for transduced Jurkat cells were puromycin at 2  $\mu\text{g/ml}$ ,  
686 hygromycin B at 200  $\mu\text{g/ml}$ , G418 at 500  $\mu\text{g/ml}$ , Blastidicin at 10  $\mu\text{g/ml}$ , or Zeocin at 50  $\mu\text{g/ml}$ . After 4-10  
687 days of antibiotic selection cell populations were typically 100% fluorescence positive, at which point they  
688 were cryo-preserved in liquid nitrogen using growth media supplemented with 10% DMSO, subjected to  
689 iterative rounds of transduction with additional viruses exactly as described above, or used directly for  
690 experiments.

691

#### 692 **Whole-cell extract, immunoprecipitations, antibodies, and SDS-PAGE/Western blotting**

693 Late-log-phase cultures of  $\sim 7.5 \times 10^7$  cells were harvested by centrifugation at  $800 \times g$  for 10 min, and  
694 cell pellets were washed with PBS (phosphate-buffered saline) (2.7 mM KCl, 1.47 mM  $\text{KH}_2\text{PO}_4$ , 8.1 mM  
695  $\text{Na}_2\text{HPO}_4$ , 137 mM NaCl) and resuspended in 500-1000  $\mu\text{l}$  extraction buffer (20 mM HEPES [pH 7.6],  
696 300 mM NaCl, 20 mM imidazole, 0.1% Triton X-100, 10% glycerol, and protease inhibitor cocktail  
697 (Thermo/Pierce)). Cells were disrupted by mild sonication with the microtip of a Branson model 250  
698 sonifier on the low-power setting, and the soluble extract was clarified by centrifugation at  $14,000 \times g$  for  
699 15 min. Extract protein content was typically 5 to 10  $\mu\text{g}/\mu\text{l}$ . A portion was mixed with an equal volume of  
700 2 $\times$  SDS sample buffer and briefly heated to 75°C. For immunoprecipitations (IP), 100  $\mu\text{l}$  of soluble extract  
701 was supplemented with an additional 100  $\mu\text{l}$  of extraction buffer also containing 5  $\mu\text{l}$  anti-FLAG M2 resin  
702 (catalog number A2220; Sigma) or 5  $\mu\text{l}$  of Protein A/G resin (Santa Cruz) along with 1-2 micrograms of  
703 anti-LMO2 IgG, then rocked at 4°C for 3 to 4 h. Immune complexes were isolated by centrifugation,

[Type here]

[Type here]

Layer et al 38

704 washed 3 times with 200  $\mu$ l of extraction buffer, and eluted by heating with 100  $\mu$ l SDS sample buffer.  
705 Samples were stored at  $-80^{\circ}\text{C}$  and briefly heated again at  $75^{\circ}\text{C}$  just prior to loading onto handcast  
706 discontinuous SDS-PAGE gels with a 4% acrylamide stacking gel and a 4-to-15% linear gradient  
707 resolving gel (37.5%/1.0% [wt/vol] acrylamide-bisacrylamide), run at 15 V/cm for 90-105 min. Gels were  
708 transferred onto a 0.2- $\mu\text{m}$  polyvinylidene difluoride (PVDF) membrane (catalog number 10600022; GE)  
709 at 50 V for 2.5 h; filters were blocked in PBS–2% non fat dry milk (NFDM, Marsh FoodClub) and incubated  
710 with antibodies in blocking buffer overnight at  $4^{\circ}\text{C}$ .

711

712 The following antibodies for Western blotting were used according to the manufacturer's specifications:  
713 mouse monoclonal anti LDB1 IgG (catalog number sc-376030x; Santa Cruz) (detected with a goat anti  
714 mouse IgG Fc-horseradish peroxidase (HRP) conjugate, catalog number 31439; Thermo/Pierce), anti  
715 FLAG-HRP conjugate (catalog number A8592; Sigma), anti HA-HRP conjugate (catalog number  
716 12013819001; Roche), anti V5-HRP conjugate (to detect mSCARLET and other V5 tagged fluorescent  
717 proteins, catalog number 46-0708, Invitrogen), rabbit polyclonal anti TAL1 IgG (catalog number A305-  
718 300A, Bethyl), (detected with a goat anti rabbit IgG-HRP conjugate [catalog number 211-032-171;  
719 Jackson ImmunoResearch]), mouse monoclonal anti SSBP2 IgG (catalog number sc-166687, Santa  
720 Cruz), mouse monoclonal anti HALO IgG (catalog number G921A, Promega), mouse monoclonal anti  
721 GFP IgG (catalog number 11814460001; Roche), rabbit polyclonal anti tubulin IgG (catalog number SC-  
722 9104; Santa Cruz). The high-affinity/sensitivity/specificity mouse anti valosin-containing protein (anti  
723 VCP) antibody (catalog number ab11433; Abcam) was used for multiplex Western blotting as a loading  
724 control. The 1A93B11 mouse anti LMO2 IgG was described previously (Layer et al., 2016).

725 Western blots were developed with enhanced chemiluminescence (ECL) detection (SuperSignal Pico  
726 West Plus, catalog number 1863099, Thermo/Pierce). All images were obtained within the linear signal  
727 detection range using a ChemiDoc Touch imaging system (BioRad). Images were analyzed using  
728 ImageLab Software version 5.2.1 (BioRad) and exported to Adobe Photoshop and Illustrator for figure  
729 assembly.

[Type here]

[Type here]

Layer et al 39

730

731 **HaloLife assay: live cell pulse chase analysis**

732 1.25  $10^5$  cells were collected from log-phase cultures by centrifugation at 1,200  $\times g$  for 1 min.  
733 The culture media was removed, and cells were resuspended with 125  $\mu\text{L}$  RPMI containing  
734 10% FBS and HaloTag Ligand R110 (Promega Ca.) at a final concentration of 100nM, per the  
735 company's instructions. The resuspended cells were then incubated for 90 min at 37 °C in 5%  
736  $\text{CO}_2$ . After 90 min the cells were centrifuged at 12,000  $\times g$  for 1 min and washed with PBS (2.7  
737 mM KCl, 1.47 mM  $\text{KH}_2\text{PO}_4$ , 8.1 mM  $\text{Na}_2\text{HPO}_4$ , 137 NaCl) containing 0.1% BSA (bovine serum  
738 albumin) a total of 3 times to remove excess HaloTag Ligand R110. Cells were resuspended  
739 in 600  $\mu\text{L}$  RPMI containing 10% FBS, and 4, 150  $\mu\text{L}$  aliquots were transferred to a 96-well  
740 round-bottom plate (TPP). 10,000 events were then immediately analyzed from 1 of the 4 150  
741  $\mu\text{L}$  aliquots using a CytoFLEX benchtop cytometer (Beckman). All subsequent chase time  
742 points were collected using this initial analysis as a reference. Between flow cytometry  
743 analyses, the 96-well plate containing the HaloTag Ligand R110 labeled cells were placed in  
744 an incubator at 37°C with 5%  $\text{CO}_2$  until the next collection point. Flow cytometry analyses  
745 were collected 3, 4, and 5 hours after T0 for all cells, with the exception those containing Halo-  
746 tagged LDB1 and LYL1 due to their significantly different observed half-lives. For cells  
747 containing Halo-tagged LDB1, flow cytometry events were recorded at 6, 12, and 24 hours  
748 after T0, and analyses were recorded 1, 2, and 3 hours after the initial time point for cells  
749 containing Halo-tagged LYL1. Replicate experiments were done on consecutive days.

750

751 **Pulse-chase FCS file analysis**

[Type here]

[Type here]

Layer et al 40

752 All FCS files were analyzed using Flowjo 10.3 analysis software (FLOWJO, LLC,OR). To  
753 identify cells that were co-expressing EBFPII and/or mScarlet in conjunction with Halo-tagged  
754 proteins, non-transduced unstained Jurkat cells were used to establish a gating sequence.  
755 Their physical dimensions were grouped on an FSC-A/FSC-H plot to determine the total  
756 number of lymphocytes within the event population. A gate was then established on an FSC-  
757 A/SSC-A plot to select for live cells within the total lymphocyte population. The resulting  
758 population was then gated as a negative control for both fluorescence markers on a PB450-A  
759 (EBFPII)/FITC-A (HaloTag R110) plot. This gating sequence was then applied to all FCS files  
760 within the same experiment.

761

### 762 **Half-Life Calculations**

763 Log-linear regression curves were calculated from flow cytometry analysis data to calculate  
764 Halo-tagged protein half-lives. PB450-A (EBFPII) and FITC-A (HaloTag R110 Ligand) double  
765 positive events were calculated as a percentage of the parent population for all time points  
766 collected. Replicate data for each time point was averaged, and then normalized to the initial  
767 time point. The natural log was calculated for each of the averages, and the resulting values  
768 were represented over time on a 2-dimensional scatter plot. A trend line was calculated, and  
769 the resulting slope was used to determine Halo-tagged protein half-lives.

770

### 771 **Statistical Analysis**

772 The standard error of the mean (SEM) was calculated for individual time points in each Halo-  
773 tagged protein experiment using Microsoft Excel. SEM values were then applied to their



[Type here]

[Type here]

Layer et al 41

774 corresponding time points within the log-linear regression curves used to determine Halo-  
775 tagged protein half-lives. Results from replicate experiments were used to calculate the  
776 standard deviation, which was then divided by the square root of the number of replicates to  
777 determine the SEM. The SEM for Halo-tagged protein half-lives values were also calculated  
778 using the same formula. Half-life values were analyzed from at least 3 experiments, as  
779 previously described, and then used to calculate the SEM.

780

### 781 **ImageStream**

782  $1.25 \times 10^5$  cells were collected from log-phase cultures by centrifugation at 1,200 x g for 1 min.  
783 The culture media was removed, and cells were resuspended with 125  $\mu$ L RPMI containing  
784 10% FBS and HaloTag Ligand R110 (Promega Ca.) at a final concentration of 100nM, per the  
785 company's instructions. The resuspended cells were then incubated for 90 min at 37°C in 5%  
786 CO<sub>2</sub>. After 90 min the cells were centrifuged at 12,000 x g for 1 min and washed with PBS (2.7  
787 mM KCl, 1.47 mM KH<sub>2</sub>PO<sub>4</sub>, 8.1 mM Na<sub>2</sub>HPO<sub>4</sub>, 137 NaCl) containing 0.1% BSA (bovine serum  
788 albumin) a total of 3 times to remove excess HaloTag Ligand R110. The cells were then  
789 resuspended in 1mL PBS, and stained with SYTO 17 red fluorescent nucleic acid stain  
790 (Invitrogen) at a final concentration of 10 nM for 10 min, per manufacturer's instructions. The  
791 cells were washed once more, and resuspended with 200  $\mu$ L PBS before being analyzed using  
792 ImageStream®<sup>X</sup> Mark II Imaging Flow Cytometer (MilliporeSigma). Data analysis was done  
793 using the IDEAS 6.2's (Millipore) nuclear localization analysis Wizard.

794

### 795 **Confocal Imaging**

[Type here]

[Type here]

Layer et al 42

796 1.25x10<sup>5</sup> cells were collected from log-phase cultures by centrifugation at 1,200 x g for 1 min.  
797 The culture media was removed, and cells were resuspended with 125  $\mu$ L RPMI containing  
798 10% FBS and HaloTag Ligand R110 (Promega Ca.) at a final concentration of 100nM, then  
799 incubated for 90 min at 37°C in 5% CO<sub>2</sub>. After 90 min the HaloTag Ligand R110 labeled cells  
800 were centrifuged at 1,200 x g for 1 min and washed with PBS (2.7 mM KCl, 1.47 mM KH<sub>2</sub>PO<sub>4</sub>,  
801 8.1 mM Na<sub>2</sub>HPO<sub>4</sub>, 137 NaCl) containing 0.1% BSA (bovine serum albumin) a total of 3 times to  
802 remove excess ligand. The washed cells were then resuspended in 1mL of PBS and stained  
803 with SYTO 17 red fluorescent nucleic acid stain (Molecular Probes, Inc. OR) according to the  
804 manufacturer's protocol. After the incubation period, the cells were centrifuged at 1,200 x g for  
805 1 min and washed once with PBS. Once resuspended in 300  $\mu$ L of PBS, cells were  
806 transferred to a 12 mm glass base dish and imaged with a Leica TCS SP8 confocal imaging  
807 system (Leica Microsystems Inc, IL) using an HC PL APO 40x/1.3 oil CS2 objective. Digital  
808 images were rendered, and signal intensities were analyzed using Imaris visualization and  
809 analysis software (Bitplane Inc. MA). Cellular localization of HaloTagged proteins was  
810 determined by calculating the ratio of mean HaloTag signal intensities within the nucleus  
811 versus the cytosol. The nuclear area was established using the SYTO 17 red fluorescent  
812 nucleic acid stain, and the cytoplasmic region was determined using the diffuse EBFPII signal  
813 expressed by our lentiviral vectors.

814

815

816

817

818

[Type here]

[Type here]

Layer et al 43

[Type here]

[Type here]

Layer et al 44

## 820 **References**

- 821 Bonifacino, J.S., Cosson, P., and Klausner, R.D. (1990). Colocalized transmembrane determinants for  
822 ER degradation and subunit assembly explain the intracellular fate of TCR chains. *Cell* **63**, 503-513.
- 823 Breitschopf, K., Bengal, E., Ziv, T., Admon, A., and Ciechanover, A. (1998). A novel site for  
824 ubiquitination: the N-terminal residue, and not internal lysines of MyoD, is essential for conjugation and  
825 degradation of the protein. *The EMBO Journal* **17**, 5964.
- 826 Cai, G., Imasaki, T., Yamada, K., Cardelli, F., Takagi, Y., and Asturias, F.J. (2010). Mediator head  
827 module structure and functional interactions. *Nat Struct Mol Biol* **17**, 273-279.
- 828 Davé, U., Akagi, K., Tripathi, R., and Cleveland, S. (2009). Murine leukemias with retroviral insertions at  
829 Lmo2 are predictive of the leukemias induced in SCID-X1 patients following retroviral gene therapy.  
830 *PLoS genetics*.
- 831 Davé, U.P., Jenkins, N.A., and Copeland, N.G. (2004). Gene therapy insertional mutagenesis insights.  
832 *Science* **303**, 333.
- 833 Deng, W., Lee, J., Wang, H., Miller, J., Reik, A., Gregory, P.D., Dean, A., and Blobel, G.A. (2012).  
834 Controlling long-range genomic interactions at a native locus by targeted tethering of a looping factor.  
835 *Cell* **149**, 1233-1244.
- 836 Deshaies, R.J. (2015). Protein degradation: prime time for PROTACs. *Nature chemical biology* **11**, 634.
- 837 Dong, W.F., Xu, Y., Hu, Q.L., Munroe, D., Minowada, J., Housman, D.E., and Minden, M.D. (1995).  
838 Molecular characterization of a chromosome translocation breakpoint t(11;14)(p13;q11) from the cell  
839 line KOPT-K1. *Leukemia* **9**, 1812-1817.
- 840 El Omari, K., Hoosdally, S.J., Tuladhar, K., Karia, D., Vyas, P., Patient, R., Porcher, C., and Mancini,  
841 E.J. (2011). Structure of the leukemia oncogene LMO2: implications for the assembly of a  
842 hematopoietic transcription factor complex. *Blood* **117**, 2146-2156.
- 843 Emanuele, Michael J., Elia, Andrew E.H., Xu, Q., Thoma, Claudio R., Izhar, L., Leng, Y., Guo, A.,  
844 Chen, Y.-N., Rush, J., Hsu, Paul W.-C., *et al.* (2011). Global Identification of Modular Cullin-RING  
845 Ligase Substrates. *Cell* **147**, 459-474.
- 846 Ferrando, A.A., Neuberg, D.S., Staunton, J., Loh, M.L., Huard, C., Raimondi, S.C., Behm, F.G., Pui,  
847 C.H., Downing, J.R., Gilliland, D.G., *et al.* (2002). Gene expression signatures define novel oncogenic  
848 pathways in T cell acute lymphoblastic leukemia. *Cancer Cell* **1**, 75-87.
- 849 Gao, X.-D., Tachikawa, H., Sato, T., Jigami, Y., and Dean, N. (2005). Alg14 Recruits Alg13 to the  
850 Cytoplasmic Face of the Endoplasmic Reticulum to Form a Novel Bipartite UDP-N-acetylglucosamine  
851 Transferase Required for the Second Step of N-Linked Glycosylation. *Journal of Biological Chemistry*  
852 **280**, 36254-36262-36262.
- 853 Greer, J.P. (2019). *Wintrobe's clinical hematology*, Fourteenth edition. edn (Philadelphia, PA: Wolters  
854 Kluwer).

[Type here]

[Type here]

Layer et al 45

- 855 Güngör, C., Taniguchi-Ishigaki, N., Ma, H., Drung, A., Tursun, B., Ostendorff, H.P., Bossenz, M.,  
856 Becker, C.G., Becker, T., and Bach, I. (2007). Proteasomal selection of multiprotein complexes  
857 recruited by LIM homeodomain transcription factors. *Proceedings of the National Academy of Sciences*  
858 *104*, 15000-15005.
- 859 Hewitt, K., Johnson, K., Gao, X., Keles, S., and Bresnick, E. (2016). The hematopoietic stem and  
860 progenitor cell cistrome: GATA factor-dependent cis-regulatory mechanisms. In *Current topics in*  
861 *developmental biology* (Elsevier), pp. 45-76.
- 862 Hewitt, Kyle J., Kim, Duk H., Devadas, P., Prathibha, R., Zuo, C., Sanalkumar, R., Johnson, Kirby D.,  
863 Kang, Y.-A., Kim, J.-S., Dewey, Colin N., *et al.* (2015). Hematopoietic Signaling Mechanism Revealed  
864 from a Stem/Progenitor Cell Cistrome. *Molecular Cell* *59*, 62-74.
- 865 Howard, P.W., Jue, S.F., Ransom, D.G., and Maurer, R.A. (2010). Regulation of LIM-domain-binding 1  
866 protein expression by ubiquitination of Lys 134. *The Biochemical journal* *429*, 127-136.
- 867 Imasaki, T., Calero, G., Cai, G., Tsai, K.L., Yamada, K., Cardelli, F., Erdjument-Bromage, H., Tempst,  
868 P., Berger, I., Kornberg, G.L., *et al.* (2011). Architecture of the Mediator head module. *Nature* *475*, 240-  
869 243.
- 870 Jagannathan-Bogdan, M., and Zon, L.I. (2013). Hematopoiesis. *Development* *140*, 2463-2467.
- 871 Kim, W., Bennett, Eric J., Huttlin, Edward L., Guo, A., Li, J., Possemato, A., Sowa, Mathew E., Rad, R.,  
872 Rush, J., Comb, Michael J., *et al.* (2011). Systematic and Quantitative Assessment of the Ubiquitin-  
873 Modified Proteome. *Molecular Cell* *44*, 325-340.
- 874 Komander, D., and Rape, M. (2012). The ubiquitin code. *Annual review of biochemistry* *81*, 203-229.
- 875 Krivega, I., Dale, R.K., and Dean, A. (2014a). Role of LDB1 in the transition from chromatin looping to  
876 transcription activation. *Genes & development* *28*, 1278-1290.
- 877 Krivega, I., Dale, R.K., and Dean, A. (2014b). Role of LDB1 in the transition from chromatin looping to  
878 transcription activation. *Genes Dev* *28*, 1278-1290.
- 879 Lai, A.C., and Crews, C.M. (2017). Induced protein degradation: an emerging drug discovery paradigm.  
880 *Nature reviews Drug discovery* *16*, 101.
- 881 Layer, J.H., Alford, C.E., McDonald, W.H., and Dave, U.P. (2016). LMO2 Oncoprotein Stability in T-Cell  
882 Leukemia Requires Direct LDB1 Binding. *Mol Cell Biol* *36*, 488-506.
- 883 Li, L., Jothi, R., Cui, K., Lee, J.Y., Cohen, T., Gorivodsky, M., Tzchori, I., Zhao, Y., Hayes, S.M.,  
884 Bresnick, E.H., *et al.* (2011). Nuclear adaptor Ldb1 regulates a transcriptional program essential for the  
885 maintenance of hematopoietic stem cells. *Nat Immunol* *12*, 129-136.
- 886 Liu, G., and Dean, A. (2019). Enhancer long-range contacts: The multi-adaptor protein LDB1 is the tie  
887 that binds. *Biochimica et Biophysica Acta (BBA)-Gene Regulatory Mechanisms*.
- 888 Los, G.V., Encell, L.P., McDougall, M.G., Hartzell, D.D., Karassina, N., Zimprich, C., Wood, M.G.,  
889 Learish, R., Ohana, R.F., and Urh, M. (2008). HaloTag: a novel protein labeling technology for cell  
890 imaging and protein analysis. *ACS chemical biology* *3*, 373-382.

[Type here]

[Type here]

Layer et al 46

- 891 Lurie, L.J., Boyer, M.E., Grass, J.A., and Bresnick, E.H. (2008). Differential GATA factor stabilities:  
892 implications for chromatin occupancy by structurally similar transcription factors. *Biochemistry* 47, 859-  
893 869.
- 894 Mashtalir, N., D'Avino, A.R., Michel, B.C., Luo, J., Pan, J., Otto, J.E., Zullo, H.J., McKenzie, Z.M.,  
895 Kubiak, R.L., and Pierre, R.S. (2018). Modular organization and assembly of SWI/SNF family chromatin  
896 remodeling complexes. *Cell* 175, 1272-1288. e1220.
- 897 McCormack, M.P., and Rabbitts, T.H. (2004). Activation of the T-cell oncogene LMO2 after gene  
898 therapy for X-linked severe combined immunodeficiency. *N Engl J Med* 350, 913-922.
- 899 McCormack, M.P., Shields, B.J., Jackson, J.T., Nasa, C., Shi, W., Slater, N.J., Tremblay, C.S.,  
900 Rabbitts, T.H., and Curtis, D.J. (2013). Requirement for Lyl1 in a model of Lmo2-driven early T-cell  
901 precursor ALL. *Blood* 122, 2093-2103.
- 902 Meier, N., Krpic, S., Rodriguez, P., Strouboulis, J., Monti, M., Krijgsveld, J., Gering, M., Patient, R.,  
903 Hostert, A., and Grosveld, F. (2006). Novel binding partners of Ldb1 are required for haematopoietic  
904 development. *Development (Cambridge, England)* 133, 4913-4923.
- 905 Mevissen, T.E., Hospenthal, M.K., Geurink, P.P., Elliott, P.R., Akutsu, M., Arnaudo, N., Ekkebus, R.,  
906 Kulathu, Y., Wauer, T., and El Oualid, F. (2013). OTU deubiquitinases reveal mechanisms of linkage  
907 specificity and enable ubiquitin chain restriction analysis. *Cell* 154, 169-184.
- 908 Morrow, M.E., Morgan, M.T., Clerici, M., Growkova, K., Yan, M., Komander, D., Sixma, T.K., Simicek,  
909 M., and Wolberger, C. (2018). Active site alanine mutations convert deubiquitinases into high-affinity  
910 ubiquitin-binding proteins. *EMBO reports* 19, e45680.
- 911 Murre, C. (2019). Helix–loop–helix proteins and the advent of cellular diversity: 30 years of discovery.  
912 *Genes & development* 33, 6-25.
- 913 Nam, C.H., and Rabbitts, T.H. (2006). The role of LMO2 in development and in T cell leukemia after  
914 chromosomal translocation or retroviral insertion. *Mol Ther* 13, 15-25.
- 915 Ono, Y., Fukuhara, N., and Yoshie, O. (1998). TAL1 and LIM-only proteins synergistically induce  
916 retinaldehyde dehydrogenase 2 expression in T-cell acute lymphoblastic leukemia by acting as  
917 cofactors for GATA3. *Molecular and cellular biology* 18, 6939-6950.
- 918 Orkin, S.H., and Zon, L.I. (2008). SnapShot: hematopoiesis. *Cell* 132, 712-712.
- 919 Ostendorff, H.P., Peirano, R.I., Peters, M.A., Schluter, A., Bossenz, M., Scheffner, M., and Bach, I.  
920 (2002). Ubiquitination-dependent cofactor exchange on LIM homeodomain transcription factors. *Nature*  
921 416, 99-103.
- 922 Raetz, E.A., and Teachey, D.T. (2016). T-cell acute lymphoblastic leukemia. *ASH Education Program*  
923 *Book 2016*, 580-588.
- 924 Schlaeger, T.M., Schuh, A., Flitter, S., Fisher, A., Mikkola, H., Orkin, S.H., Vyas, P., and Porcher, C.  
925 (2004). Decoding hematopoietic specificity in the helix-loop-helix domain of the transcription factor  
926 SCL/Tal-1. *Mol Cell Biol* 24, 7491-7502.

[Type here]

[Type here]

Layer et al 47

- 927 Smith, S., Tripathi, R., Goodings, C., Cleveland, S., Mathias, E., Hardaway, J.A., Elliott, N., Yi, Y.,  
928 Chen, X., Downing, J., *et al.* (2014). LIM domain only-2 (LMO2) induces T-cell leukemia by two distinct  
929 pathways. *PLoS ONE* *9*, e85883.
- 930 Soler, E., Andrieu-Soler, C., de Boer, E., Bryne, J.C., Thongjuea, S., Stadhouders, R., Palstra, R.-J.,  
931 Stevens, M., Kockx, C., and van IJcken, W. (2010). The genome-wide dynamics of the binding of Ldb1  
932 complexes during erythroid differentiation. *Genes & development* *24*, 277-289.
- 933 Song, S.-H., Hou, C., and Dean, A. (2007). A positive role for NLI/Ldb1 in long-range  $\beta$ -globin locus  
934 control region function. *Molecular cell* *28*, 810-822.
- 935 Sun, X.-J., Wang, Z., Wang, L., Jiang, Y., Kost, N., Soong, T.D., Chen, W.-Y., Tang, Z., Nakadai, T.,  
936 Elemento, O., *et al.* (2013). A stable transcription factor complex nucleated by oligomeric AML1-ETO  
937 controls leukaemogenesis. *Nature*, 1-6.
- 938 Trausch-Azar, J.S., Lingbeck, J., Ciechanover, A., and Schwartz, A.L. (2004). Ubiquitin-Proteasome-  
939 mediated degradation of Id1 is modulated by MyoD. *Journal of Biological Chemistry* *279*, 32614-32619.
- 940 Unutmaz, D., KewalRamani, V.N., Marmon, S., and Littman, D.R. (1999). Cytokine signals are sufficient  
941 for HIV-1 infection of resting human T lymphocytes. *101084/jem20050075* *189*, 1735-1746.
- 942 Vilimas, T., Mascarenhas, J., Palomero, T., Mandal, M., Buonamici, S., Meng, F., Thompson, B.,  
943 Spaulding, C., Macaroun, S., and Alegre, M.-L. (2007). Targeting the NF- $\kappa$ B signaling pathway in  
944 Notch1-induced T-cell leukemia. *Nature medicine* *13*, 70.
- 945 Wadman, I.A., Osada, H., Grutz, G.G., Agulnick, A.D., Westphal, H., Forster, A., and Rabbitts, T.H.  
946 (1997). The LIM-only protein Lmo2 is a bridging molecule assembling an erythroid, DNA-binding  
947 complex which includes the TAL1, E47, GATA-1 and Ldb1/NLI proteins. *Embo J* *16*, 3145-3157.
- 948 Wang, T., Yu, H., Hughes, N.W., Liu, B., Kendirli, A., Klein, K., Chen, W.W., Lander, E.S., and Sabatini,  
949 D.M. (2017). Gene essentiality profiling reveals gene networks and synthetic lethal interactions with  
950 oncogenic Ras. *Cell* *168*, 890-903. e815.
- 951 Wilson, N.K., Foster, S.D., Wang, X., Knezevic, K., Schütte, J., Kaimakis, P., Chilarska, P.M., Kinston,  
952 S., Ouwehand, W.H., and Dzierzak, E. (2010). Combinatorial transcriptional control in blood  
953 stem/progenitor cells: genome-wide analysis of ten major transcriptional regulators. *Cell stem cell* *7*,  
954 532-544.
- 955 Wright, K.J., Marr, M.T., and Tjian, R. (2006). TAF4 nucleates a core subcomplex of TFIID and  
956 mediates activated transcription from a TATA-less promoter. *Proceedings of the National Academy of*  
957 *Sciences* *103*, 12347-12352.
- 958 Xu, Z., Huang, S., Chang, L.S., Agulnick, A.D., and Brandt, S.J. (2003). Identification of a TAL1 target  
959 gene reveals a positive role for the LIM domain-binding protein Ldb1 in erythroid gene expression and  
960 differentiation. *Mol Cell Biol* *23*, 7585-7599.
- 961 Xu, Z., Meng, X., Cai, Y., Liang, H., Nagarajan, L., and Brandt, S.J. (2007). Single-stranded DNA-  
962 binding proteins regulate the abundance of LIM domain and LIM domain-binding proteins. *Genes Dev*  
963 *21*, 942-955.  
964

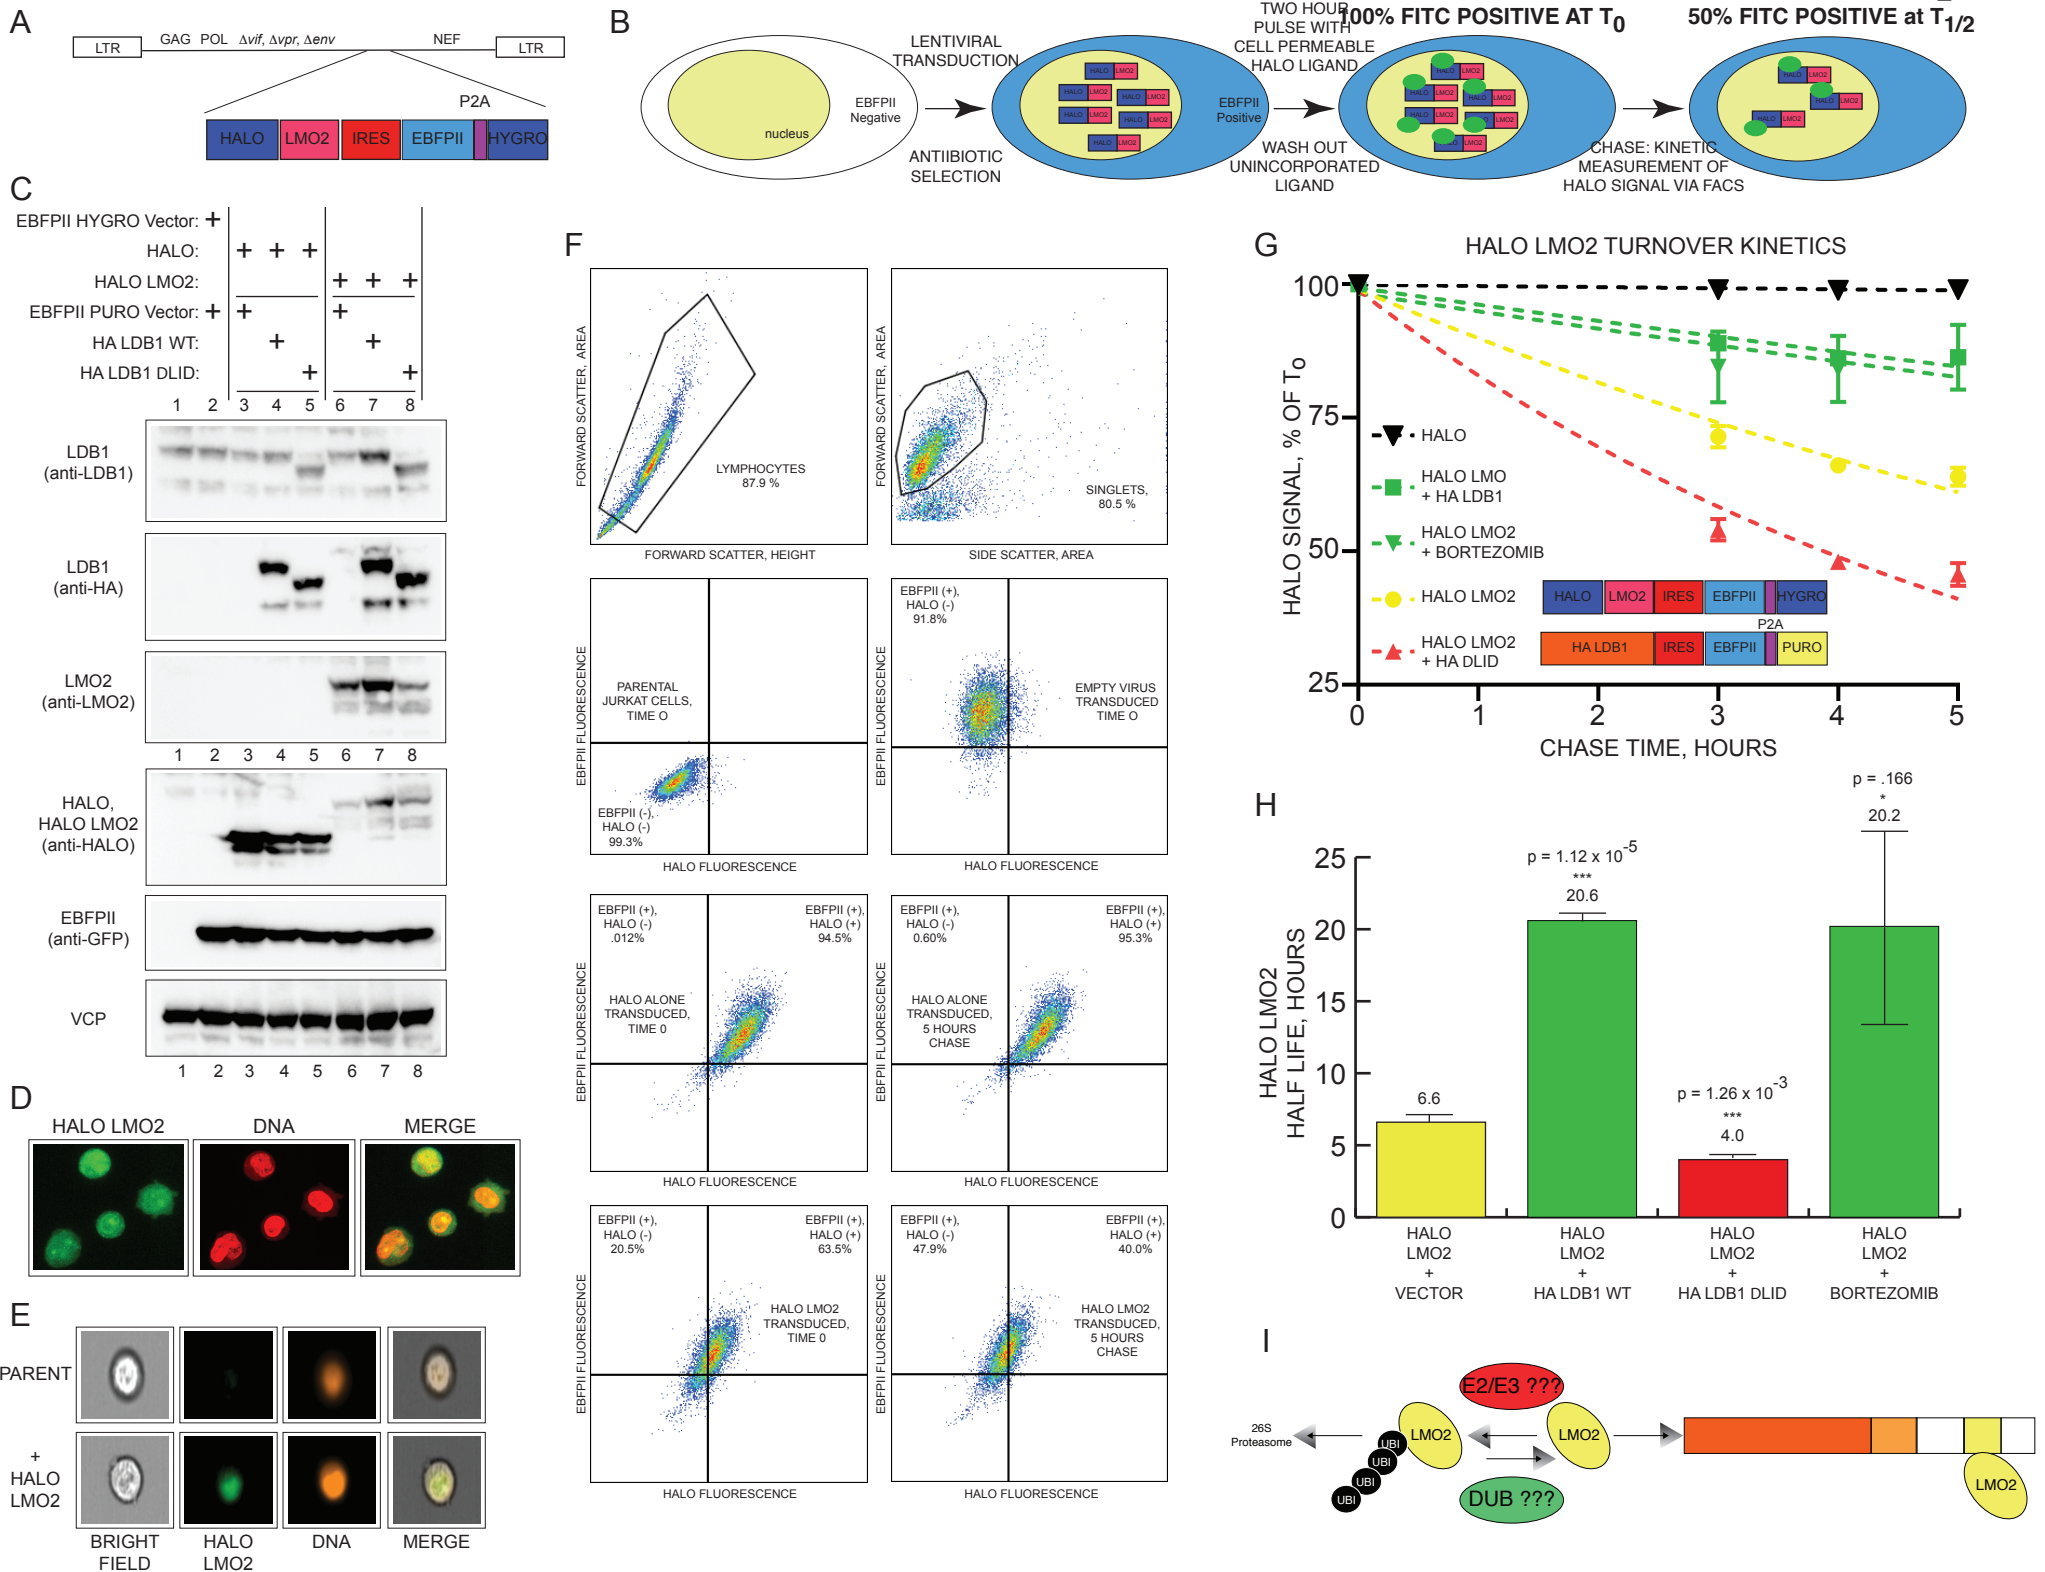



**A**

|                              |   |   |   |   |   |   |   |   |   |    |    |
|------------------------------|---|---|---|---|---|---|---|---|---|----|----|
| EBFP11 HYGRO Vector:         | 1 | 2 | 3 | 4 | 5 | 6 | 7 | 8 | 9 | 10 | 11 |
| HALO:                        |   | + | + |   |   |   |   |   |   |    |    |
| HALO LMO2 WT:                |   |   |   | + |   |   |   |   |   |    |    |
| HALO LMO2 L64A L71A:         |   |   |   |   | + |   |   |   |   |    |    |
| HALO LMO2 K(O):              |   |   |   |   |   | + |   |   |   |    |    |
| HALO LMO2 K74R K78R:         |   |   |   |   |   |   | + |   |   |    |    |
| HALO LMO2 K(O) +K74, +K78:   |   |   |   |   |   |   |   | + |   |    |    |
| HALO LMO2 K(O) +K74:         |   |   |   |   |   |   |   |   | + |    |    |
| HALO LMO2 K(O) +K78:         |   |   |   |   |   |   |   |   |   | +  |    |
| HALO N+LMO2 K(O) +K74, +K78: |   |   |   |   |   |   |   |   |   |    | +  |

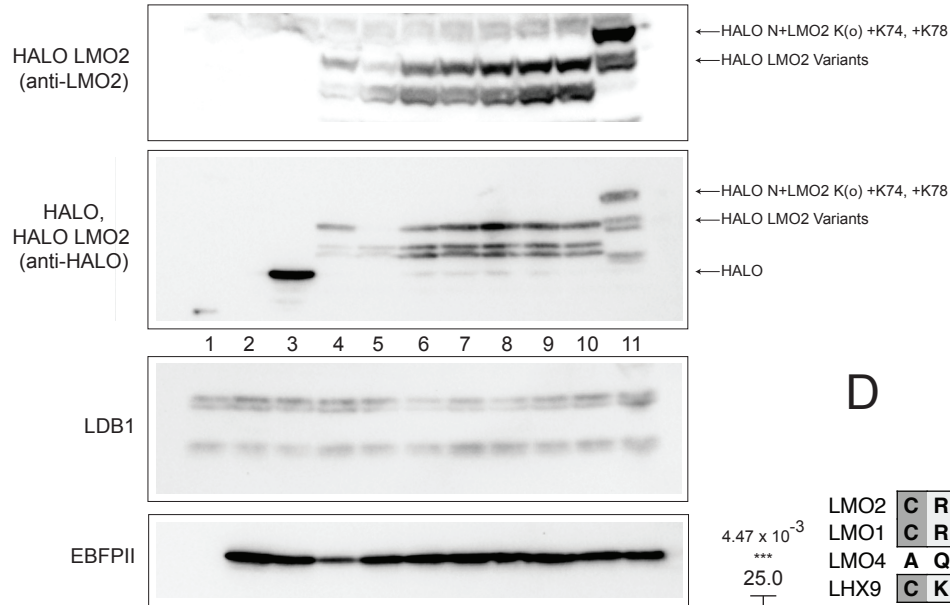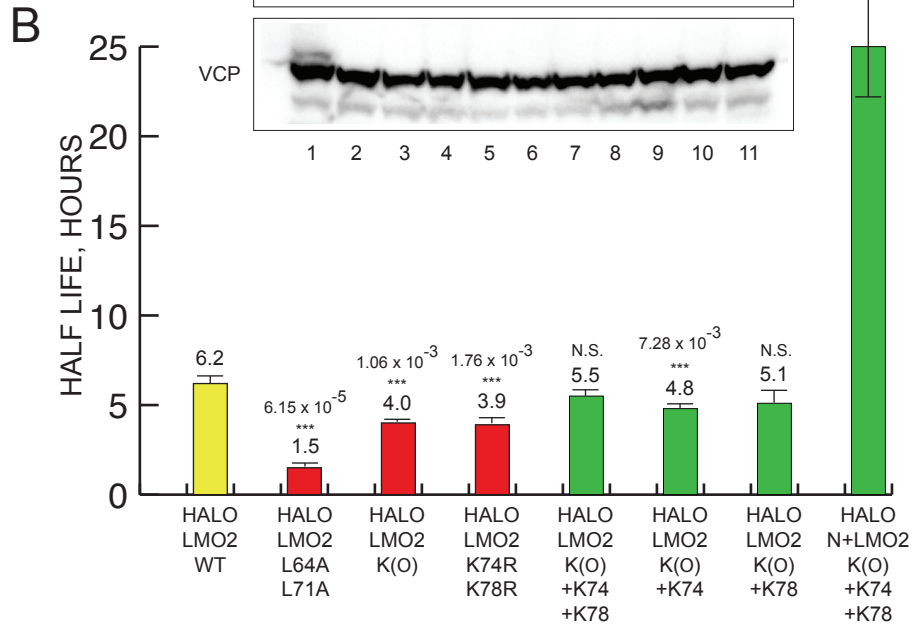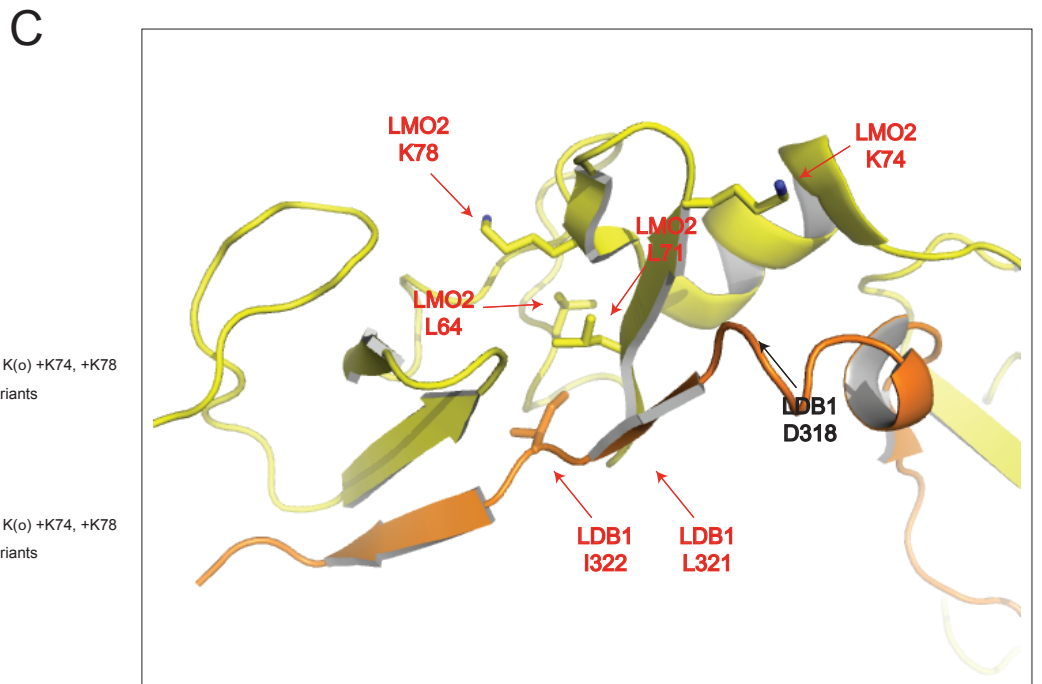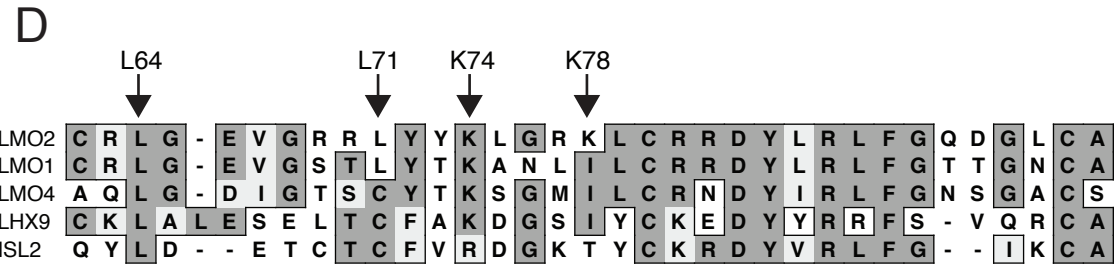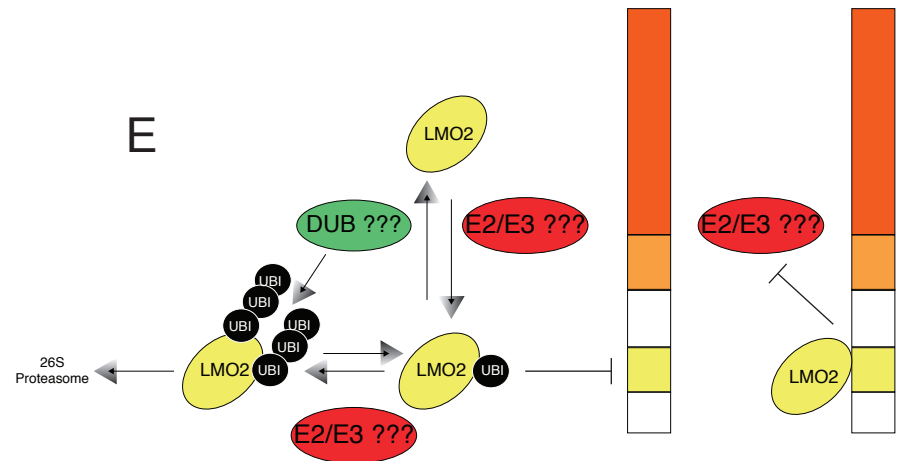

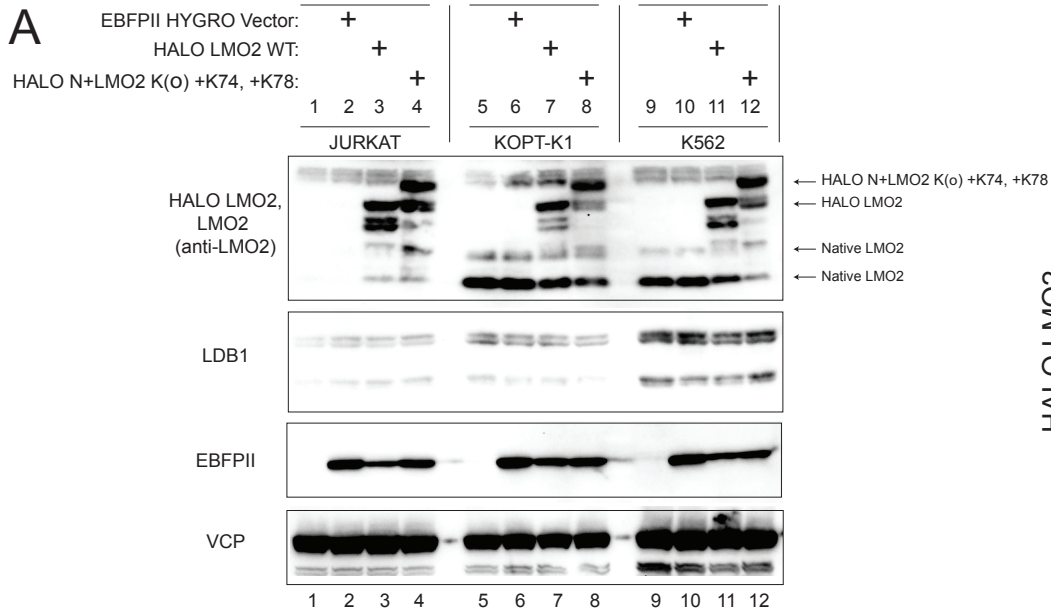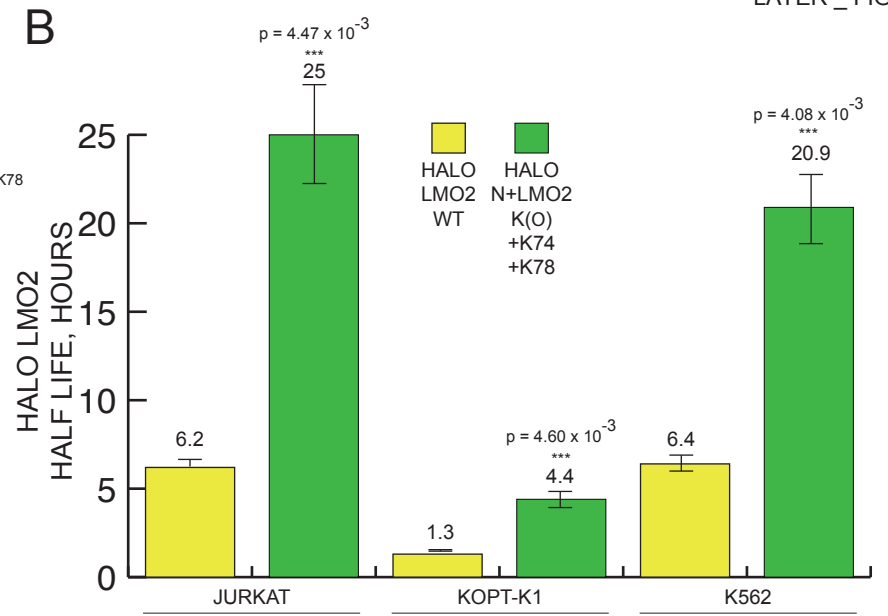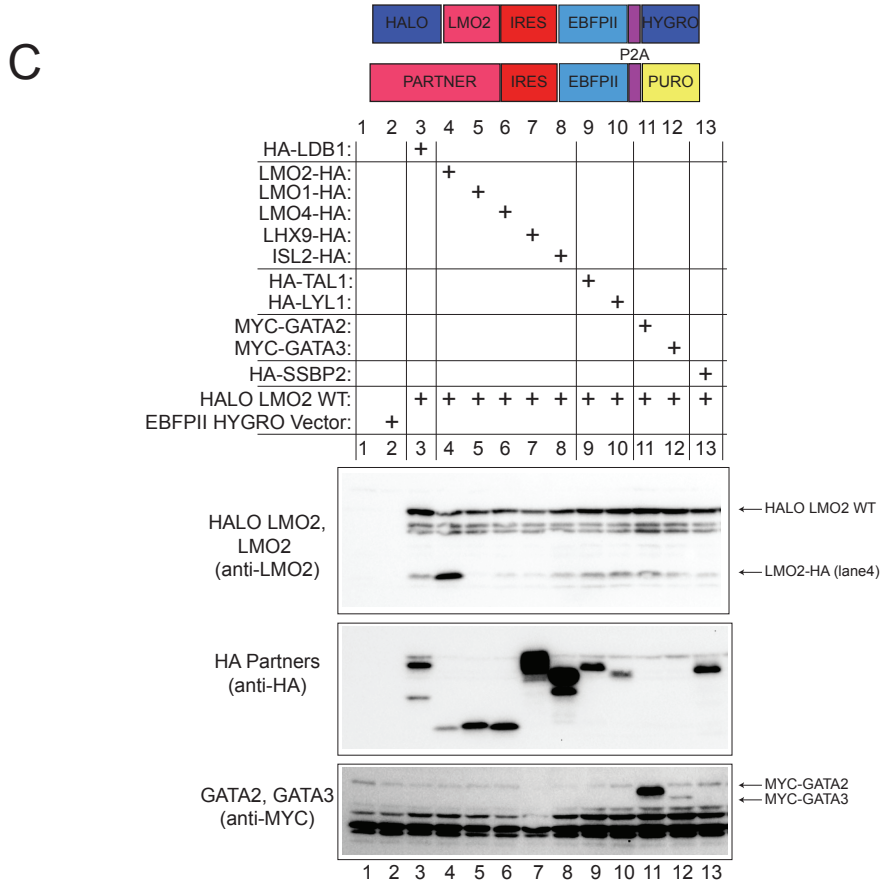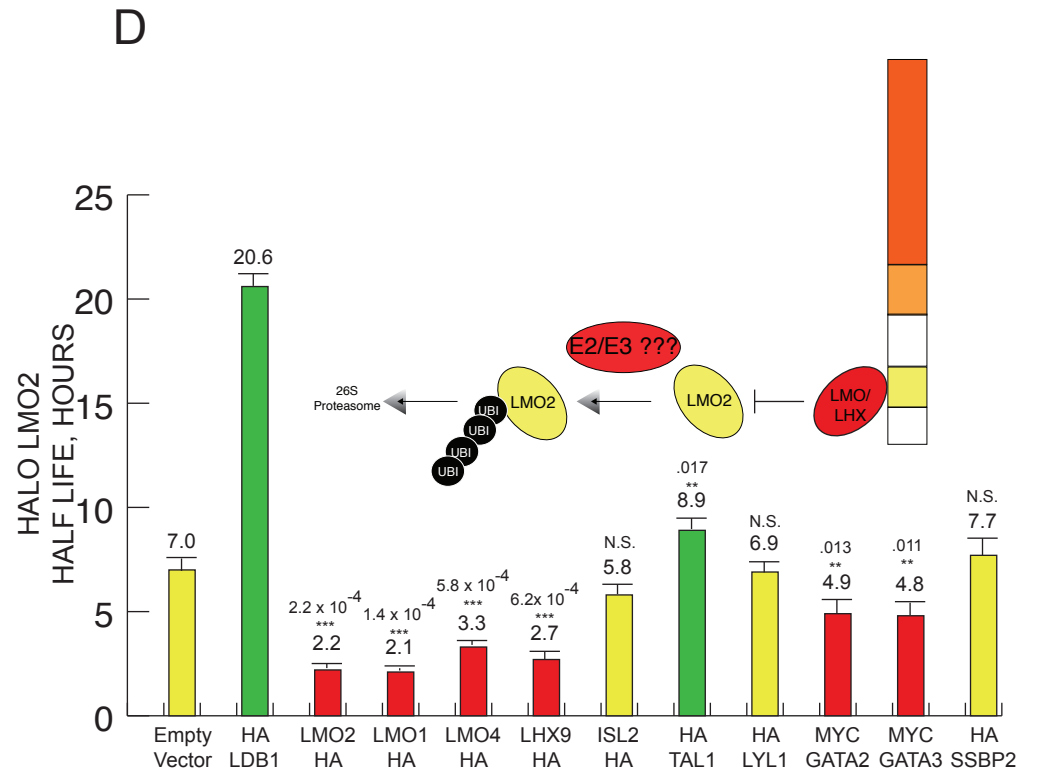

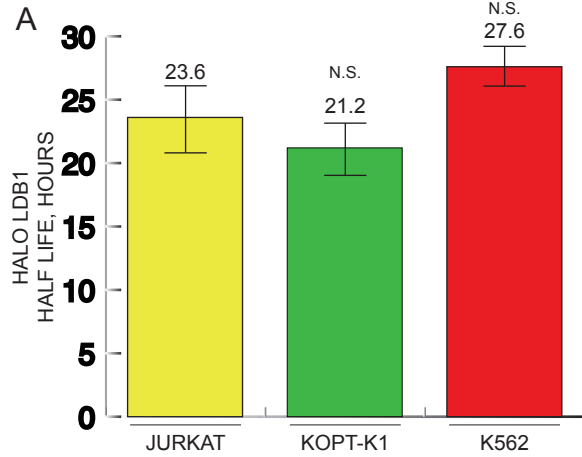

**E**

| EBFP11 BLAST Vector: + | CORE |   |   | SSBP |   |   | Type II bHLH | GATA |   |    | ALT. LIM | E Box |    |    |    |
|------------------------|------|---|---|------|---|---|--------------|------|---|----|----------|-------|----|----|----|
|                        | 1    | 2 | 3 | 4    | 5 | 6 | 7            | 8    | 9 | 10 | 11       | 12    | 13 | 14 | 15 |
| HALO LDB1:             |      |   |   | +    |   |   |              |      |   |    |          |       |    |    |    |
| HALO LMO2:             |      |   |   |      |   |   |              |      |   |    |          |       |    |    |    |
| HALO SSBP2:            |      |   |   |      |   |   |              |      |   |    |          |       |    |    |    |
| HALO SSBP3:            |      |   |   |      |   |   |              |      |   |    |          |       |    |    |    |
| HALO SSBP4:            |      |   |   |      |   |   |              |      |   |    |          |       |    |    |    |
| HALO TAL1:             |      |   |   |      |   |   |              |      |   |    |          |       |    |    |    |
| HALO LYL1:             |      |   |   |      |   |   |              |      |   |    |          |       |    |    |    |
| HALO GATA1:            |      |   |   |      |   |   |              |      |   |    |          |       |    |    |    |
| HALO GATA2:            |      |   |   |      |   |   |              |      |   |    |          |       |    |    |    |
| HALO GATA3:            |      |   |   |      |   |   |              |      |   |    |          |       |    |    |    |
| HALO LMO1:             |      |   |   |      |   |   |              |      |   |    |          |       |    |    |    |
| HALO LMO4:             |      |   |   |      |   |   |              |      |   |    |          |       |    |    |    |
| HALO ISL2:             |      |   |   |      |   |   |              |      |   |    |          |       |    |    |    |
| HALO TCF3:             |      |   |   |      |   |   |              |      |   |    |          |       |    |    |    |

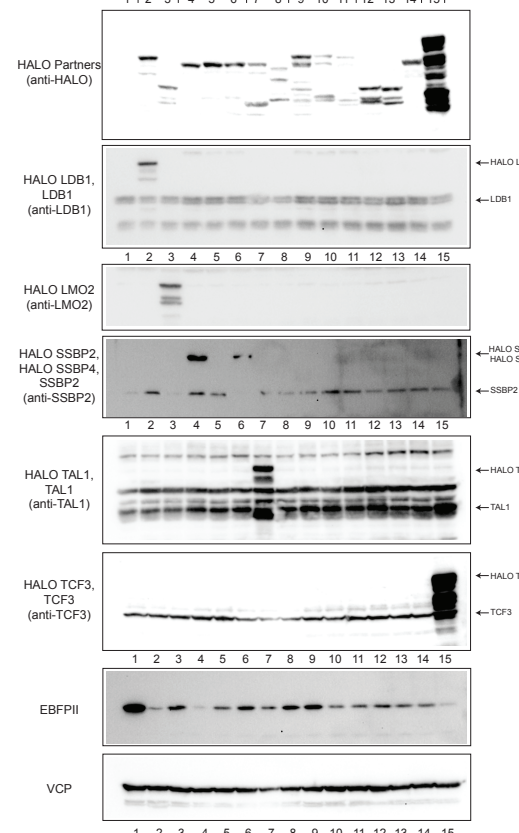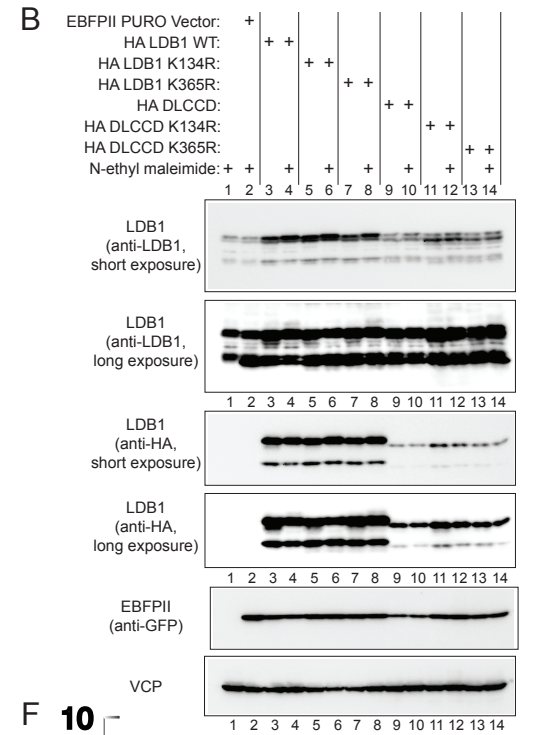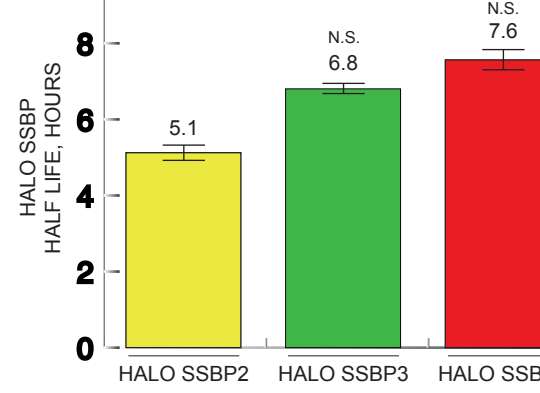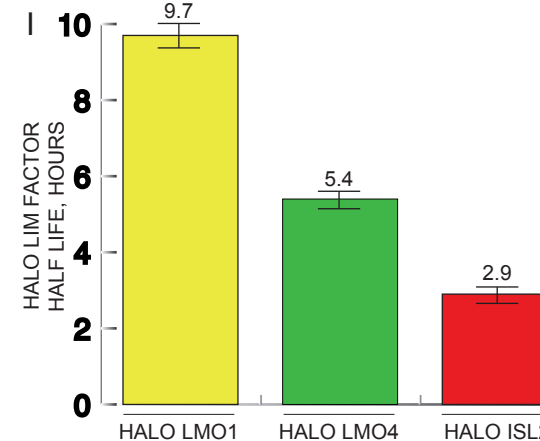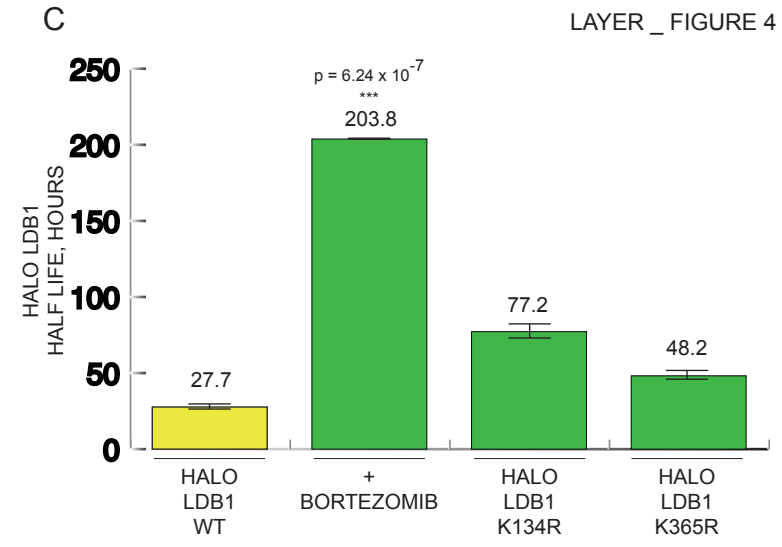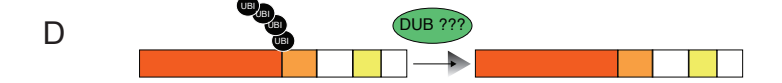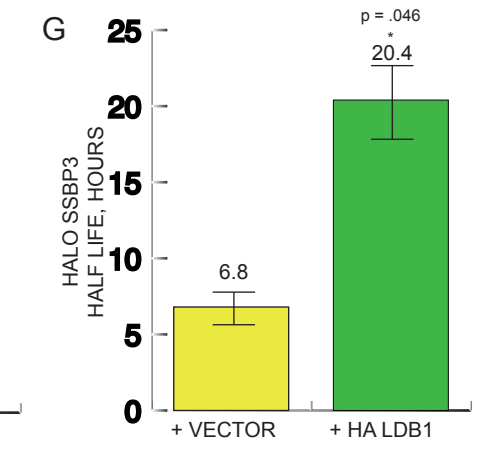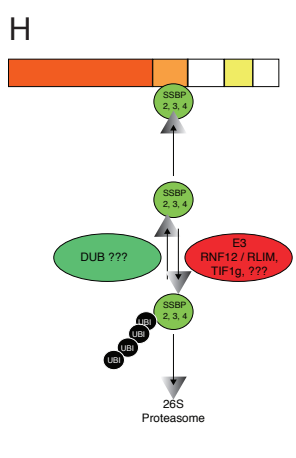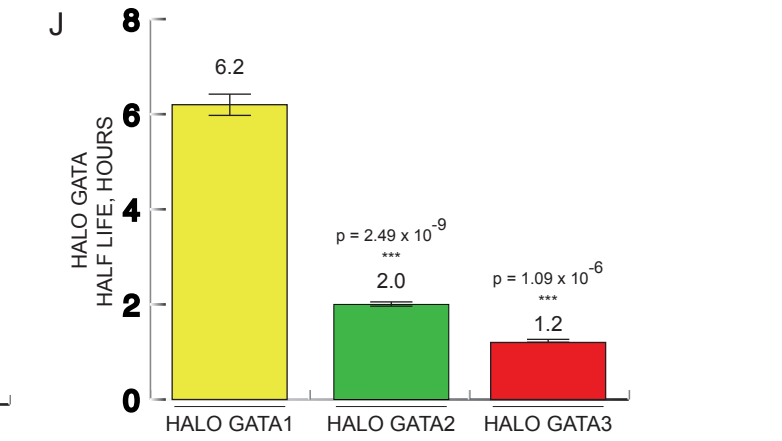





**A**

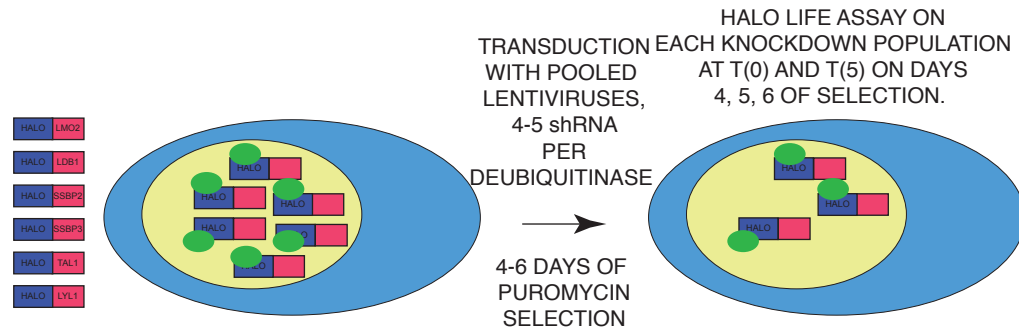

POSITIVE HITS SCORED BY:

- I. REDUCED % OF T(0) DUB shRNA TO T(0) SCRAMBLED shRNA
- II. REDUCED T(0) HALO SIGNAL
- III. REDUCED % OF T(0) at T(5) RELATIVE TO SCRAMBLED shRNA

FULFILLS AT LEAST 2 CRITERIA

FULFILLS ALL 3 CRITERIA

**B**

|         | Present in growth |        | OTU DUB FAMILY |           |            |            |           |           |
|---------|-------------------|--------|----------------|-----------|------------|------------|-----------|-----------|
|         | JURKAT?           | effect | HALO LMO2      | HALO LDB1 | HALO SSBP2 | HALO SSBP3 | HALO TAL1 | HALO LYL1 |
| OTUB1   | NO                | NO     |                |           |            |            |           |           |
| OTUB2   | YES               | NO     |                |           | YES        |            |           |           |
| OTUD5   | YES               | NO     |                |           |            |            |           |           |
| OTUD6A  | ?                 | NO     |                |           |            | YES        |           |           |
| OTUD6B  | YES               | YES    |                |           |            |            | YES       |           |
| OTUD7A  | YES               | YES    |                |           |            |            |           |           |
| OTUD7B  | YES               | NO     | YES            | YES       | YES        | YES        | YES       | YES       |
| ALG13   | YES               | SEVERE | YES            | YES       | YES        | YES        | YES       | YES       |
| TNFAIP3 | ?                 | SEVERE |                |           |            |            |           |           |
| VCPIP1  | YES               | NO     |                |           |            |            |           | YES       |
| ZRANB1  | ?                 | NO     |                |           | YES        |            |           | YES       |

**C**

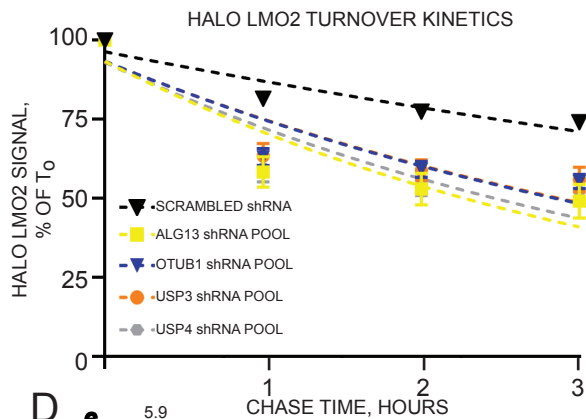

**D**

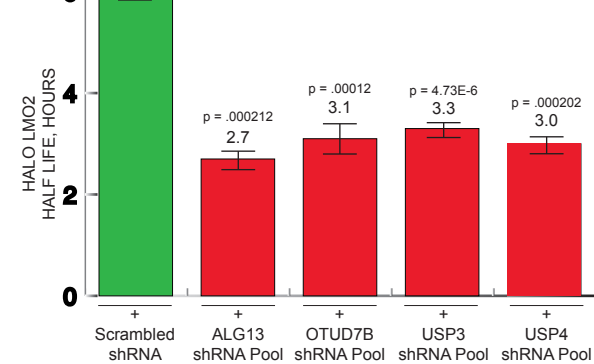

**E**

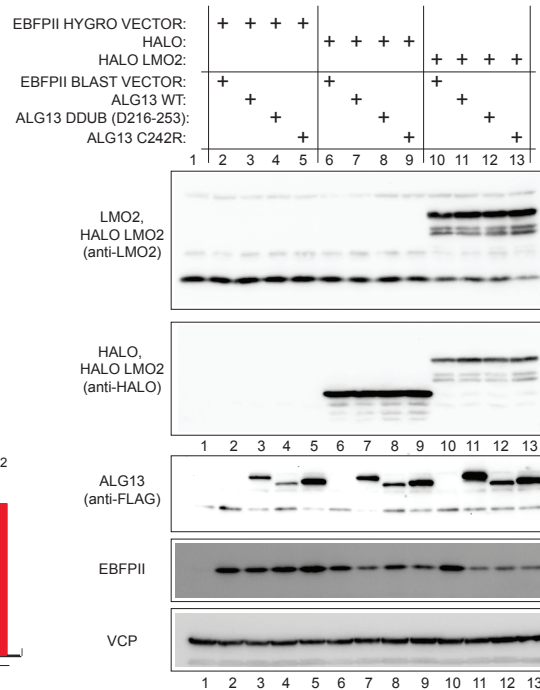

**F**

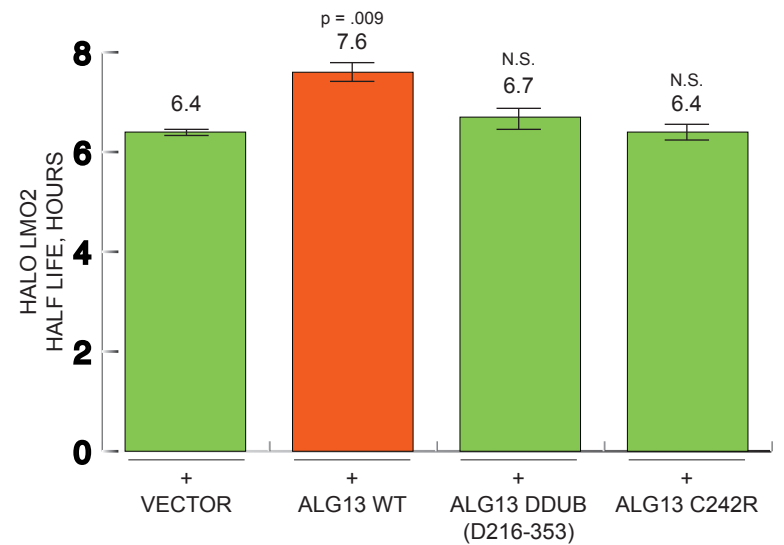

**G**

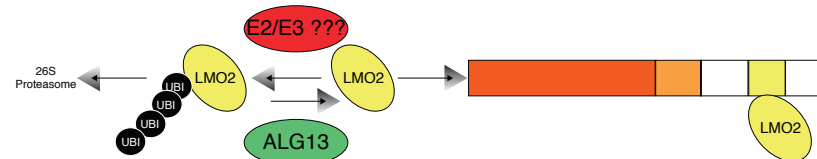

Source: https://www.biorxiv.org/content/10.1101/706259v2.full.pdf
